# Supplementary material for: Zircon PrVO4: an efficient heterogeneous catalyst for tandem oxidative synthesis of 2,3-disubstituted quinoline derivatives
Source: Royal Society of Chemistry journal article supplement (doi:10.1039/d3dt00435j), 2023-01-01
Supplement: d3dt00435j1.pdf [file d3dt00435j1.pdf]

## Electronic Supplementary Information for

### Zircon PrVO<sub>4</sub>: An Efficient Heterogeneous Catalyst for Tandem Oxidative Synthesis of 2,3-Disubstituted Quinoline Derivatives

Neetu Yadav, Kovuru Gopalaiah,\* Jyoti Pandey and Rajamani Nagarajan\*

Department of Chemistry

University of Delhi, Delhi-110007, INDIA

---

#### Table of contents

|                                                                                          |                    |
|------------------------------------------------------------------------------------------|--------------------|
| PXRD pattern of synthesized PrVO <sub>4</sub> sample.....                                | S2                 |
| Tables S1 and S2 containing the Rietveld refinement results.....                         | S3                 |
| <a href="#">Typical procedure for the synthesis of 3,4-Dihydroacridin-1(2H)-one.....</a> | <a href="#">S4</a> |
| Characterization of quinoline products.....                                              | S4                 |
| References.....                                                                          | S9                 |
| NMR spectra of quinoline products ( <b>3a-3m</b> ).....                                  | S10                |
| FTIR spectra of <b>3a-3m</b> .....                                                       | S23                |

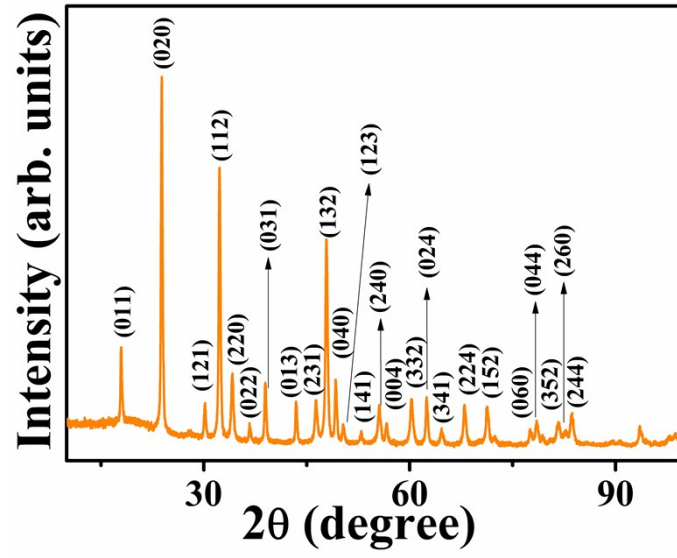

**Figure S1.** PXRD pattern of PrVO<sub>4</sub> sample calcined at 475 °C for 3 h.

**Table S1.** Crystallographic details from the structural refinement of the PXRD pattern of PrVO<sub>4</sub> by the Rietveld method.

| Composition                               | PrVO <sub>4</sub> |
|-------------------------------------------|-------------------|
| <i>a</i> (Å)                              | 7.3599 (9)        |
| <i>c</i> (Å)                              | 6.4660 (1)        |
| Cell volume (Å <sup>3</sup> )             | 350.258 (8)       |
| Formula weight (g/mol)                    | 255.85            |
| <i>Z</i>                                  | 4                 |
| $\rho_{\text{calc}}$ (g/cm <sup>3</sup> ) | 4.851             |
| Temperature (°C)                          | 25                |
| No. of data points                        | 9000              |
| 2 $\theta$ range                          | 10-100°           |
| $R_p$                                     | 0.0684            |
| $R_{wp}$                                  | 0.0919            |
| $\chi^2$                                  | 0.7993            |

**Table S2.** Atomic parameters from the final cycle of refinement of the PXRD patterns of PrVO<sub>4</sub> sample by the Rietveld method.

| Composition       | Atoms | Wyck        | <i>x/a</i> | <i>y/b</i> | <i>z/c</i> | SOF | U(iso)Å <sup>2</sup> |
|-------------------|-------|-------------|------------|------------|------------|-----|----------------------|
| PrVO <sub>4</sub> | Pr    | 4 <i>a</i>  | 0.0        | 0.75       | 0.125      | 1.0 | 0.0249 (3)           |
|                   | V     | 4 <i>b</i>  | 0.0        | 0.25       | 0.375      | 1.0 | 0.0227 (5)           |
|                   | O     | 16 <i>h</i> | 0.0        | 0.0711 (4) | 0.2186 (5) | 1.0 | 0.0217 (12)          |

**Typical procedure for the synthesis of 3,4-Dihydroacridin-1(2H)-one:** To the magnetically stirred mixture of the 2-aminobenzylalcohol **1a** (123.07 mg, 1 mmol) and 1,3-cyclohexanedione **2a** (123.25 mg, 1.1 mmol, 1.1 equiv) was added zircon PrVO<sub>4</sub> (25.58 mg, 0.1 mmol, 10 mol%) and the mixture was heated at 110 °C under oxygen atmosphere (O<sub>2</sub> balloon) for 12 h. After completion of the reaction (monitored by TLC), the mixture was allowed to cool to the room temperature. The mixture was diluted with ethyl acetate (3 mL), adsorbed on silica gel (2 g) and dried in vacuo. The residue was charged on to chromatography (100-200 mesh silica gel) column and eluted with 10% EtOAc-hexane to afford pure **3a** (179.3 mg, 91%). All the remaining reactions were performed on 1 mmol scale following this general procedure. The spectral data of the synthesised compounds are provided below.

### Characterization of quinoline products

#### 3,4-Dihydroacridin-1(2H)-one (**3a**)

Yellow solid; yield: 91%; Melting Point: 104-106 °C (Lit.: 105-106 °C)<sup>1</sup>.

<sup>1</sup>H NMR (400 MHz, CDCl<sub>3</sub>): δ 8.84 (s, 1H), 8.03 (d, *J* = 8.8 Hz, 1H), 7.92 (d, *J* = 8.0 Hz, 1H), 7.80 (t, *J* = 7.2 Hz, 1H), 7.54 (t, *J* = 8.0 Hz, 1H), 3.31 (t, *J* = 6.4 Hz, 2H), 2.79 (t, *J* = 6.4 Hz, 2H), 2.27 (qu, *J* = 6.4 Hz, 2H).

<sup>13</sup>C NMR (100 MHz, CDCl<sub>3</sub>): δ 197.9, 161.9, 149.6, 137.1, 132.3, 132.7, 128.5, 126.7, 126.6, 126.2, 39.0, 33.4, 21.7.

HRMS: *m/z* [M+H]<sup>+</sup> calcd for C<sub>13</sub>H<sub>11</sub>NO: 198.0913, found: 198.0914.

#### 3,3-Dimethyl-3,4-dihydroacridin-1(2H)-one (**3b**)

Brown solid; yield: 90%; Melting Point: 112-114 °C (Lit.: 112-113 °C)<sup>1</sup>.

$^1\text{H}$  NMR (400 MHz,  $\text{CDCl}_3$ ):  $\delta$  8.81 (s, 1H), 8.04 (d,  $J = 8.8$  Hz, 1H), 7.92 (d,  $J = 8.4$  Hz, 1H), 7.81-7.77 (m, 1H), 7.56-7.52 (m, 1H), 3.18 (s, 2H), 2.64 (s, 2H), 1.13 (s, 6H).

$^{13}\text{C}$  NMR (100 MHz,  $\text{CDCl}_3$ ):  $\delta$  197.9, 160.8, 149.9, 136.5, 132.2, 129.7, 128.5, 126.7, 125.2, 52.4, 47.1, 32.7, 28.3.

HRMS:  $m/z$   $[\text{M}+\text{H}]^+$  calcd for  $\text{C}_{15}\text{H}_{15}\text{NO}$ : 226.1226, found: 226.1227.

### **1-(2-Methylquinolin-3-yl)ethan-1-one (3c)**

Pale yellow solid; yield: 93%; Melting Point: 76-77 °C (Lit.: 77-78 °C)<sup>1</sup>.

$^1\text{H}$  NMR (400 MHz,  $\text{CDCl}_3$ ):  $\delta$  8.47 (s, 1H), 8.03 (d,  $J = 8.4$  Hz, 1H), 7.85 (d,  $J = 8.0$  Hz, 1H), 7.80-7.76 (m, 1H), 7.57-7.53 (m, 1H), 2.91 (s, 3H), 2.71 (s, 3H).

$^{13}\text{C}$  NMR (100 MHz,  $\text{CDCl}_3$ ):  $\delta$  199.9, 157.6, 148.3, 138.2, 131.7, 131.1, 128.6, 128.3, 126.6, 125.6, 29.2, 25.6.

HRMS:  $m/z$   $[\text{M}+\text{H}]^+$  calcd for  $\text{C}_{12}\text{H}_{11}\text{NO}$ : 186.0913, found: 186.0911.

### **(2-Methylquinolin-3-yl)(phenyl)methanone (3d)**

Yellow solid; yield: 87%; Melting Point: 133-134 °C (Lit.: 134-136 °C)<sup>2</sup>.

$^1\text{H}$  NMR (400 MHz,  $\text{CDCl}_3$ ):  $\delta$  8.15-8.10 (m, 2H), 7.83-7.80 (m, 2H), 7.78-7.73 (m, 2H), 7.62-7.58 (m, 1H), 7.53-7.41 (m, 3H), 2.75 (s, 3H).

$^{13}\text{C}$  NMR (100 MHz,  $\text{CDCl}_3$ ):  $\delta$  196.4, 156.6, 147.6, 137.0, 136.9, 133.6, 131.1, 130.0, 129.8, 128.6, 128.1, 127.9, 126.6, 125.2, 23.8.

HRMS:  $m/z$   $[\text{M}+\text{H}]^+$  calcd for  $\text{C}_{17}\text{H}_{13}\text{NO}$ : 248.1070, found: 248.1064.

### **Phenyl(2-phenylquinolin-3-yl)methanone (3e)**

Yellow solid; yield: 89%; Melting Point: 134-136 °C (Lit.: 135-137 °C)<sup>3</sup>.

$^1\text{H}$  NMR (400 MHz,  $\text{CDCl}_3$ ):  $\delta$  8.35 (s, 1H), 8.25 (d,  $J = 8.4$  Hz, 1H), 7.91 (d,  $J = 8.4$  Hz, 1H), 7.86-7.82 (m, 1H), 7.73-7.70 (m, 2H), 7.64-7.60 (m, 3H), 7.49-7.45 (m, 1H), 7.35-7.26 (m, 5H).

$^{13}\text{C}$  NMR (100 MHz,  $\text{CDCl}_3$ ):  $\delta$  196.5, 157.4, 148.3, 139.6, 137.6, 136.9, 133.3, 132.8, 131.2, 129.9, 129.6, 129.2, 128.8, 128.4, 128.3, 128.1, 127.3, 125.8.

HRMS:  $m/z$   $[\text{M}+\text{H}]^+$  calcd for  $\text{C}_{22}\text{H}_{15}\text{NO}$ : 310.1226, found: 310.1231.

### **Ethyl 2-methylquinoline-3-carboxylate (3f)**

Pale yellow solid; yield: 95%; Melting Point: 68-70 °C (Lit.: 69-70 °C)<sup>1</sup>.

$^1\text{H}$  NMR (400 MHz,  $\text{CDCl}_3$ ):  $\delta$  8.72 (s, 1H), 8.03 (d,  $J = 8.4$  Hz, 1H), 7.85 (d,  $J = 8.0$  Hz, 1H), 7.79-7.74 (m, 1H), 7.55-7.51 (m, 1H), 4.43 (q,  $J = 7.2$  Hz, 2H), 2.98 (s, 3H), 1.45 (t,  $J = 7.2$  Hz, 3H).

$^{13}\text{C}$  NMR (100 MHz,  $\text{CDCl}_3$ ):  $\delta$  166.5, 158.4, 148.6, 139.8, 131.6, 128.5, 128.4, 126.5, 125.7, 123.9, 61.4, 25.6, 14.3.

HRMS:  $m/z$   $[\text{M}+\text{H}]^+$  calcd for  $\text{C}_{13}\text{H}_{13}\text{NO}_2$ : 216.1019, found: 216.1019.

### **Methyl 2-phenylquinoline-3-carboxylate (3g)**

Yellow oil (Lit.: yellow viscous liquid)<sup>4</sup>; yield: 94%.

$^1\text{H}$  NMR (400 MHz,  $\text{CDCl}_3$ ):  $\delta$  8.67 (s, 1H), 8.19 (d,  $J = 8.4$  Hz, 1H), 7.92 (d,  $J = 8.4$  Hz, 1H), 7.84-7.80 (m, 1H), 7.66-7.59 (m, 3H), 7.51-7.43 (m, 3H), 3.74 (s, 3H).

$^{13}\text{C}$  NMR (100 MHz,  $\text{CDCl}_3$ ):  $\delta$  168.3, 157.9, 148.4, 140.5, 139.2, 131.6, 129.5, 128.6, 128.5, 128.2, 127.2, 125.7, 125.0, 52.4.

HRMS:  $m/z$   $[\text{M}+\text{H}]^+$  calcd for  $\text{C}_{17}\text{H}_{13}\text{NO}_2$ : 264.1019, found: 264.1022.

### **Methyl 2-(4-chlorophenyl)quinoline-3-carboxylate (3h)**

Light yellow solid; yield: 96%; Melting Point: 111-113 °C (Lit.: 111.2-114.4 °C)<sup>4</sup>.

<sup>1</sup>H NMR (400 MHz, CDCl<sub>3</sub>): δ 8.69 (s, 1H), 8.16 (d, *J* = 8.8 Hz, 1H), 7.93 (d, *J* = 8.0 Hz, 1H), 7.85-7.81 (m, 1H), 7.64-7.56 (m, 3H), 7.46-7.44 (m, 2H), 3.78 (s, 3H).

<sup>13</sup>C NMR (100 MHz, CDCl<sub>3</sub>): δ 167.9, 156.8, 148.4, 139.5, 139.0, 134.8, 131.8, 130.0, 129.5, 128.4, 128.3, 127.5, 125.8, 124.6, 52.5.

HRMS: *m/z* [M+H]<sup>+</sup> calcd for C<sub>17</sub>H<sub>12</sub>ClNO<sub>2</sub>: 298.0629, found: 298.0635.

### **Methyl 2-(4-methoxyphenyl)quinoline-3-carboxylate (3i)**

Pale yellow solid; yield: 93%; Melting Point: 92-96 °C (Lit.: 92.1-95.7 °C)<sup>4</sup>.

<sup>1</sup>H NMR (400 MHz, CDCl<sub>3</sub>): δ 8.60 (s, 1H), 8.16 (d, *J* = 8.4 Hz, 1H), 7.89 (d, *J* = 7.2 Hz, 1H), 7.82-7.78 (m, 1H), 7.63-7.56 (m, 3H), 7.02-6.99 (m, 2H), 3.87 (s, 3H), 3.78 (s, 3H).

<sup>13</sup>C NMR (100 MHz, CDCl<sub>3</sub>): δ 168.7, 160.2, 157.4, 148.4, 139.1, 132.9, 131.5, 130.0, 129.4, 128.2, 126.9, 125.6, 124.9, 113.7, 55.3, 52.5.

HRMS: *m/z* [M+H]<sup>+</sup> calcd for C<sub>18</sub>H<sub>15</sub>NO<sub>3</sub>: 294.1125, found: 294.1132.

### **Methyl 2-(3-methoxyphenyl)quinoline-3-carboxylate (3j)**

Light yellow oil; yield: 93%.

<sup>1</sup>H NMR (400 MHz, CDCl<sub>3</sub>): δ 8.62 (s, 1H), 8.18 (d, *J* = 8.4 Hz, 1H), 7.90 (d, *J* = 8.0 Hz, 1H), 7.83-7.79 (m, 1H), 7.61-7.57 (m, 1H), 7.37 (t, *J* = 8.0 Hz, 1H), 7.25-7.24 (m, 1H), 7.16 (d, *J* = 7.2 Hz, 1H), 7.01-6.98 (m, 1H), 3.87 (s, 3H), 3.75 (s, 3H).

<sup>13</sup>C NMR (100 MHz, CDCl<sub>3</sub>): δ 168.3, 159.5, 157.7, 148.3, 141.8, 138.9, 131.5, 129.4, 129.1, 128.1, 127.2, 125.7, 125.1, 121.0, 114.7, 113.7, 55.2, 52.4.

HRMS: *m/z* [M+H]<sup>+</sup> calcd for C<sub>18</sub>H<sub>15</sub>NO<sub>3</sub>: 294.1125, found: 294.1129.

### **Methyl 2-(2-methoxyphenyl)quinoline-3-carboxylate (3k)**

Brown oil; yield: 92%.

<sup>1</sup>H NMR (400 MHz, CDCl<sub>3</sub>): δ 8.65 (s, 1H), 8.18 (d, *J* = 8.8 Hz, 1H), 7.89 (d, *J* = 8.0 Hz, 1H), 7.79-7.75 (m, 1H), 7.72-7.70 (m, 1H), 7.59-7.55 (m, 1H), 7.44-7.39 (m, 1H), 7.16 (t, *J* = 7.6 Hz, 1H), 6.91 (d, *J* = 8.4 Hz, 1H), 3.75 (s, 3H), 3.72 (s, 3H).

<sup>13</sup>C NMR (100 MHz, CDCl<sub>3</sub>): δ 167.6, 156.4, 155.6, 148.7, 138.0, 131.1, 130.3, 130.1, 129.9, 129.4, 128.2, 126.9, 126.2, 125.8, 121.2, 109.9, 54.9, 51.9.

HRMS: *m/z* [M+H]<sup>+</sup> calcd for C<sub>18</sub>H<sub>15</sub>NO<sub>3</sub>: 294.1125, found: 294.1127.

### **1-(2,4-dimethylquinolin-3-yl)ethan-1-one (3l)**

Light yellow oil (Lit.: light yellow oil)<sup>5</sup>; yield: 89%.

<sup>1</sup>H NMR (400 MHz, CDCl<sub>3</sub>): δ 8.01-7.94 (m, 2H), 7.71-7.67 (m, 1H), 7.55-7.51 (m, 1H), 2.62 (s, 3H), 2.57 (s, 3H), 2.56 (s, 3H).

<sup>13</sup>C NMR (100 MHz, CDCl<sub>3</sub>): δ 206.6, 152.6, 146.8, 138.5, 135.6, 129.8, 129.2, 126.3, 125.9, 123.6, 32.6, 23.5, 15.2.

HRMS: *m/z* [M+H]<sup>+</sup> calcd for C<sub>13</sub>H<sub>13</sub>NO: 200.1070, found: 200.1062.

### **1-(2-methyl-4-phenylquinolin-3-yl)ethan-1-one (3m)**

Light yellow solid; yield: 85%; Melting Point: 112-115 °C (Lit.: 112-114 °C)<sup>5</sup>.

<sup>1</sup>H NMR (400 MHz, CDCl<sub>3</sub>): δ 8.07 (d, *J* = 8.4 Hz, 1H), 7.74-7.69 (m, 1H), 7.63-7.60 (m, 1H), 7.53-7.49 (m, 3H), 7.46-7.42 (m, 1H), 7.38-7.33 (m, 2H), 2.69 (s, 3H), 1.99 (s, 3H).

<sup>13</sup>C NMR (100 MHz, CDCl<sub>3</sub>): δ 205.8, 153.5, 147.5, 139.9, 135.1, 134.8, 130.1, 130.0, 128.9, 128.8, 128.7, 126.5, 126.1, 124.9, 31.9, 23.9.

HRMS: *m/z* [M+H]<sup>+</sup> calcd for C<sub>18</sub>H<sub>15</sub>NO: 262.1226, found: 262.1222



## References

- [1] Z.-H. Yu, H.-F. Zheng, W. Yuan, Z.-L. Tang, A.-D. Zhang, and D.-Q. Shi, *Tetrahedron*, 2013, **69**, 8137-8141.
- [2] Z. Wang, G. Chen, X. Zhang and X. Fan, *Org. Chem. Front.*, 2017, **4**, 612-616.
- [3] N. Anand, T. Chanda, S. Koley, S. Chowdhury and M. S. Sing, *RSC Adv.*, 2015, **5**, 7654-7660.
- [4] Y.-F. Li, Z.-G. Wu, J. Shi, Y. Pan, H. Bu, H.-F. Ma, J.-C. Gu, H. Huang, Y.-Z. Wang and L. Wu, *Tetrahedron*, 2014, **70**, 8971-8975.
- [5] K. Fobi and R. A. Bunce, *Molecules*, 2022, **27**, 4123.

## NMR spectra of quinoline products

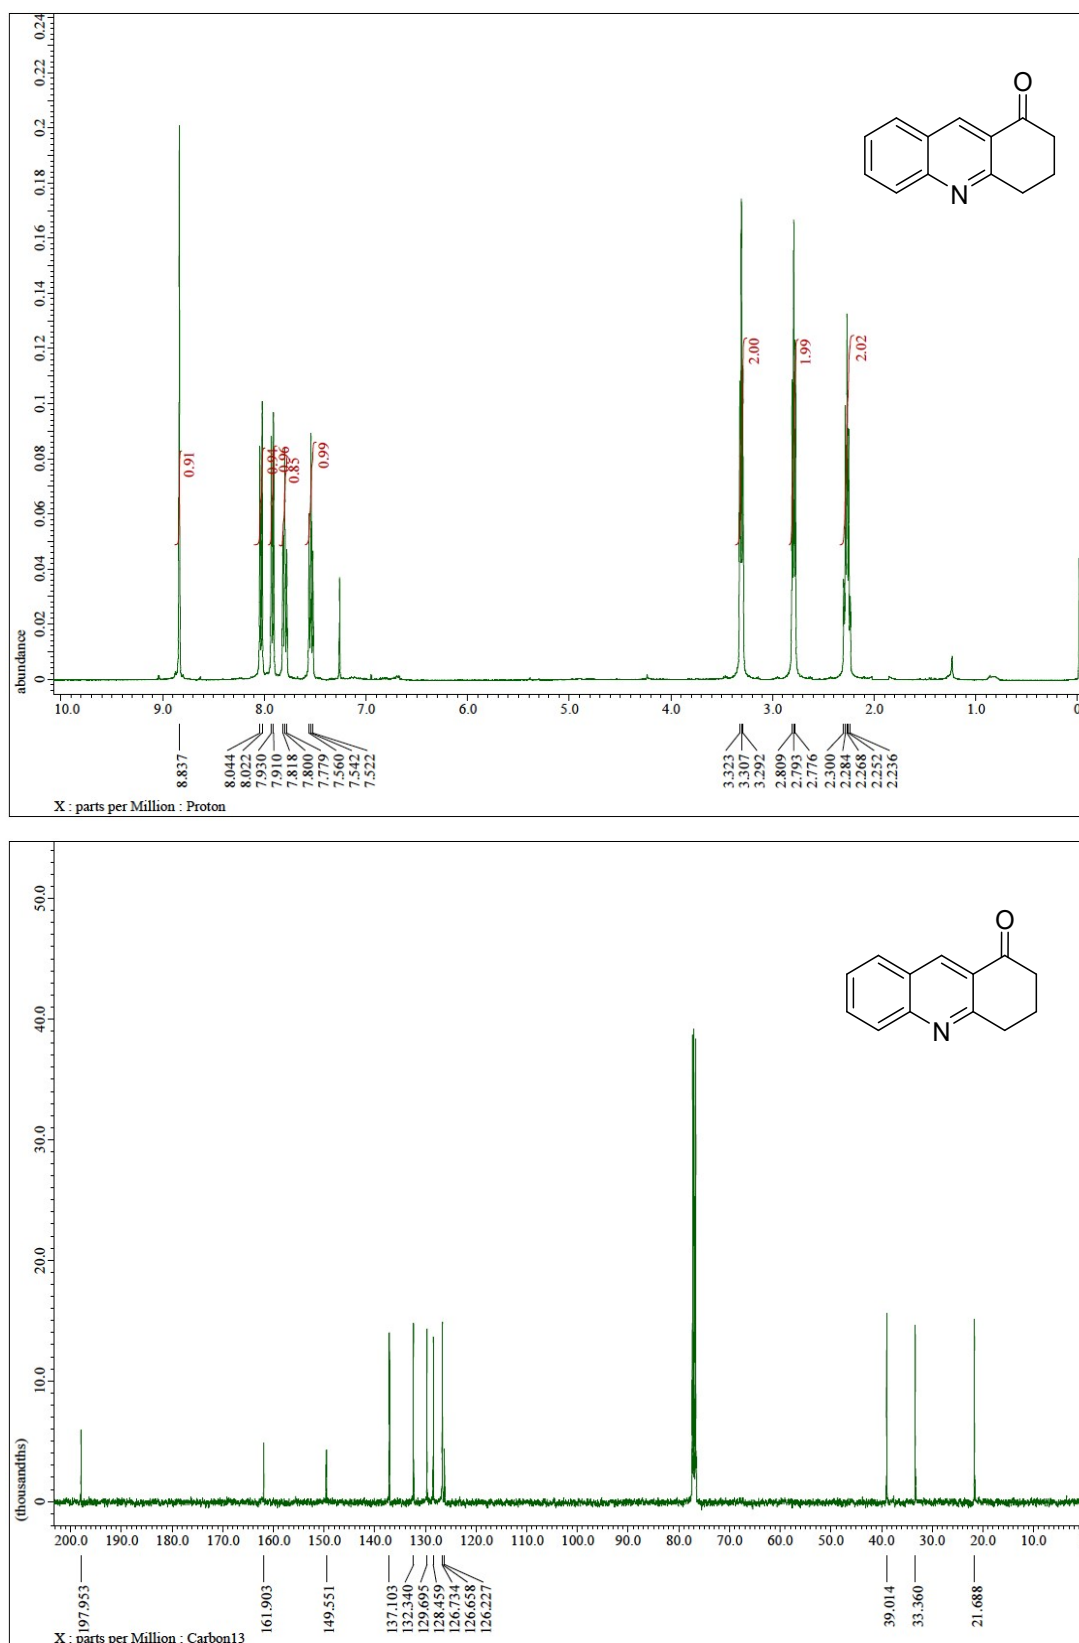

Figure S2. <sup>1</sup>H NMR of **3a** (400 MHz, CDCl<sub>3</sub>) and <sup>13</sup>C NMR of **3a** (100 MHz, CDCl<sub>3</sub>)

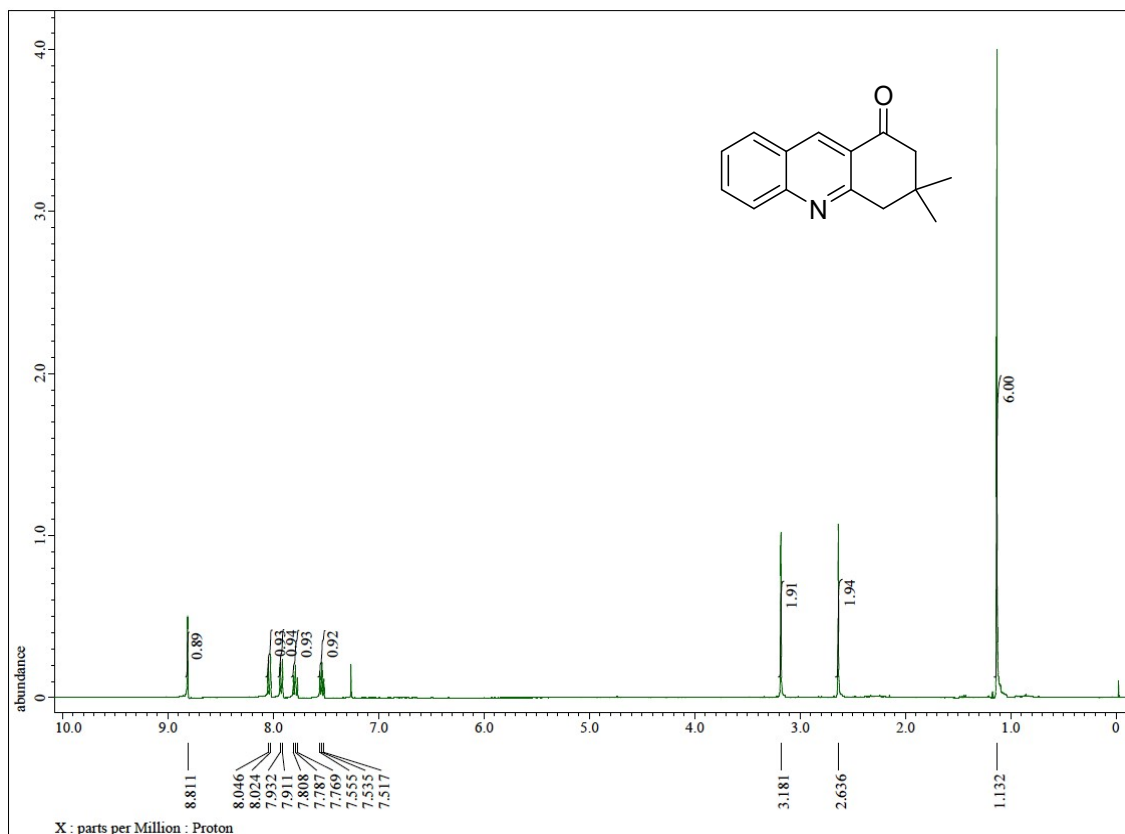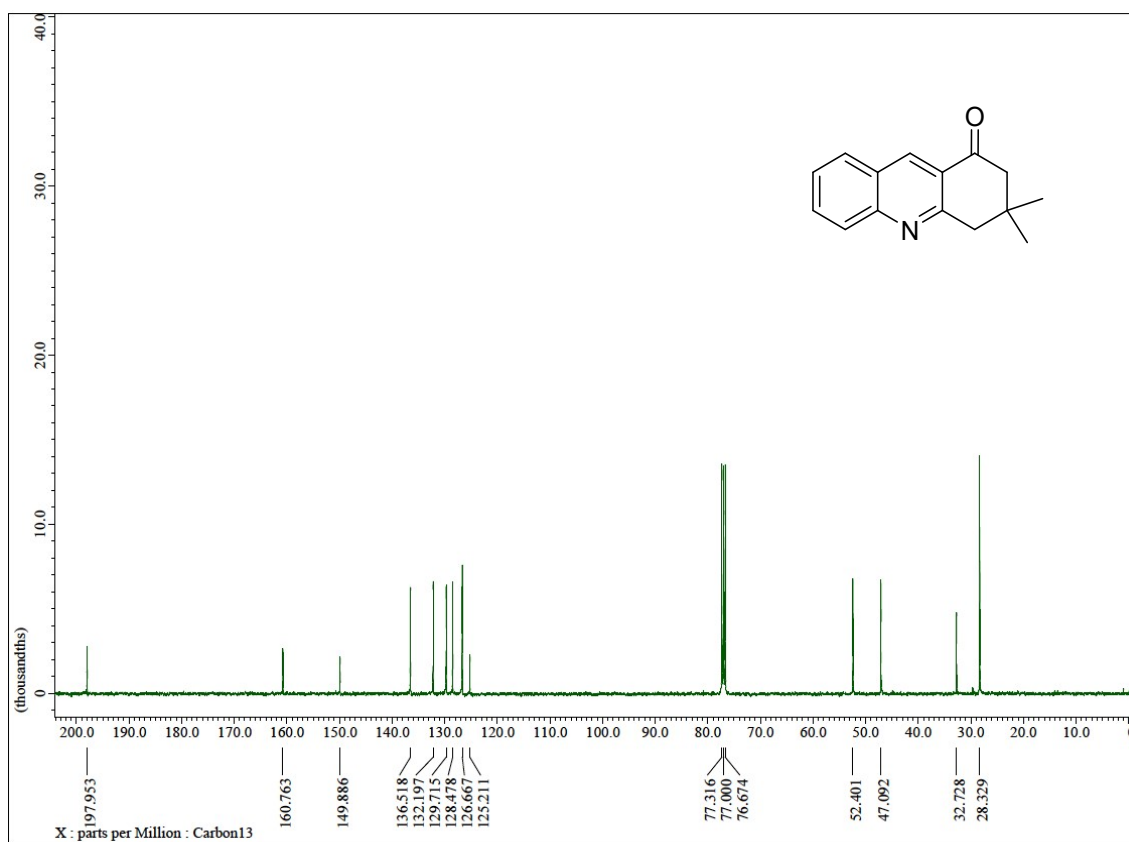

**Figure S3.** <sup>1</sup>H NMR of **3b** (400 MHz, CDCl<sub>3</sub>) and <sup>13</sup>C NMR of **3b** (100 MHz, CDCl<sub>3</sub>)

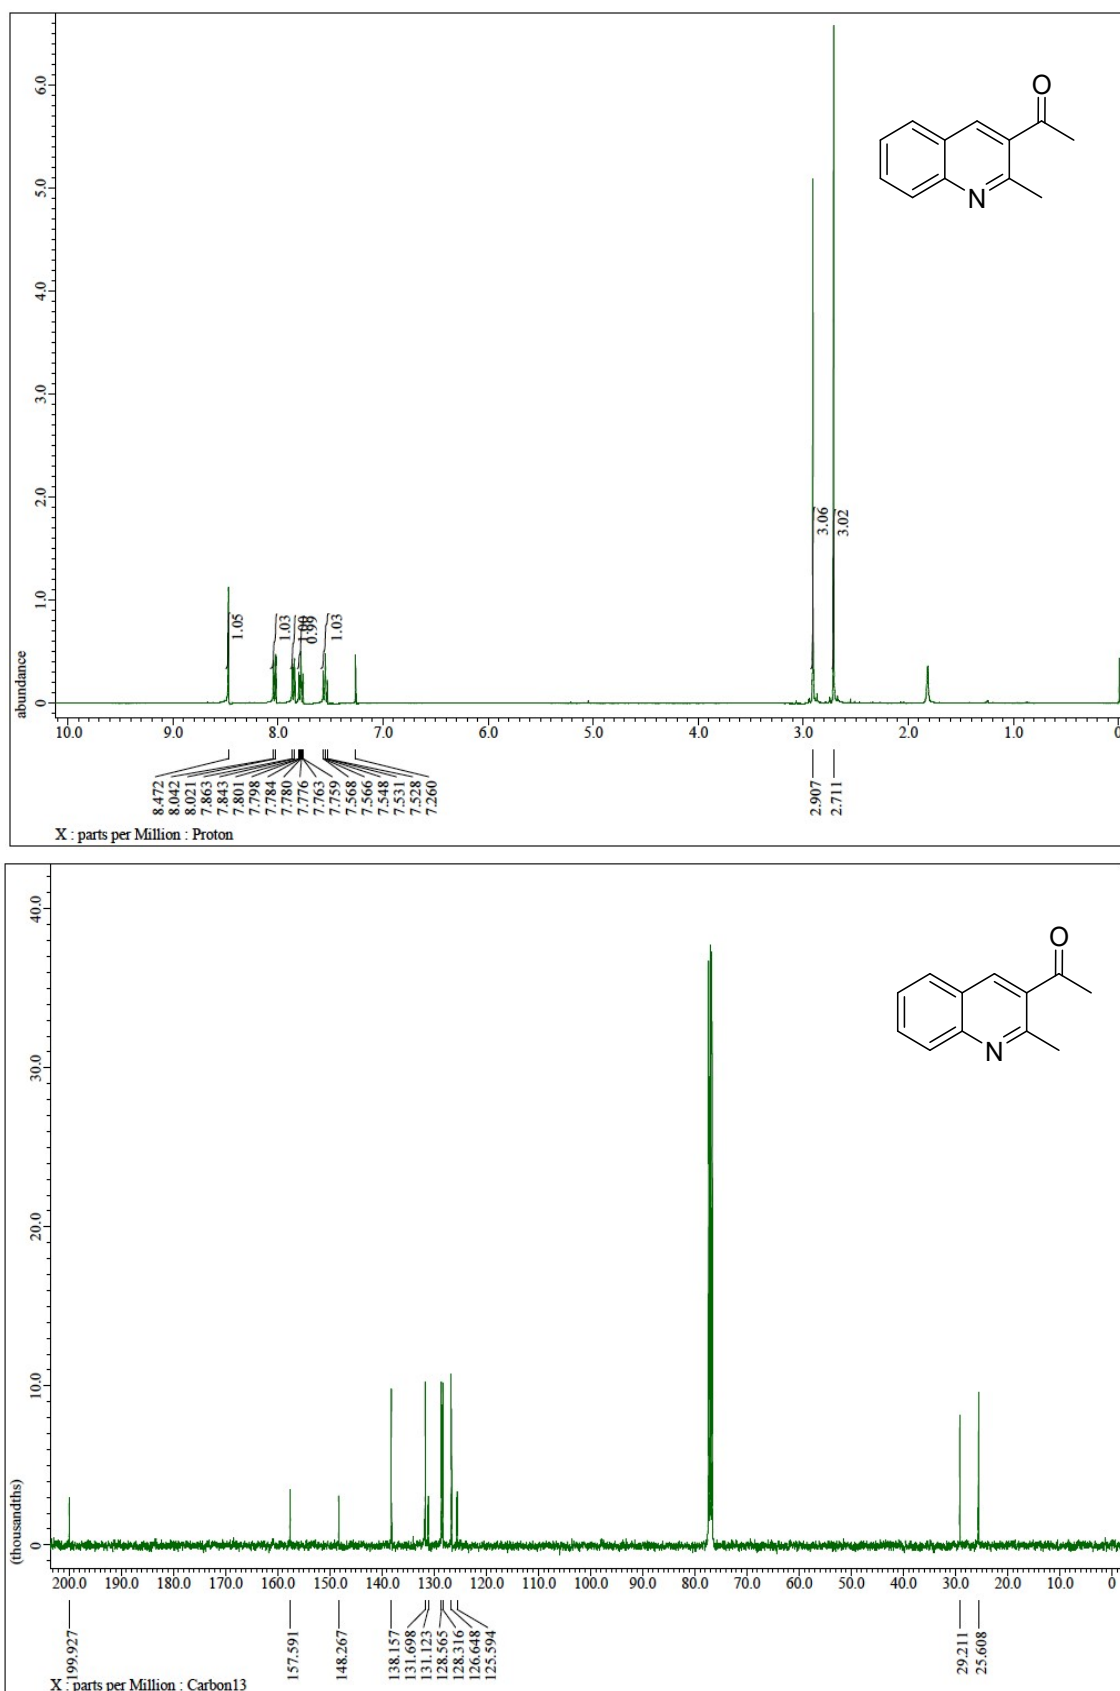

**Figure S4. <sup>1</sup>H NMR of 3c (400 MHz, CDCl<sub>3</sub>) and <sup>13</sup>C NMR of 3c (100 MHz, CDCl<sub>3</sub>)**

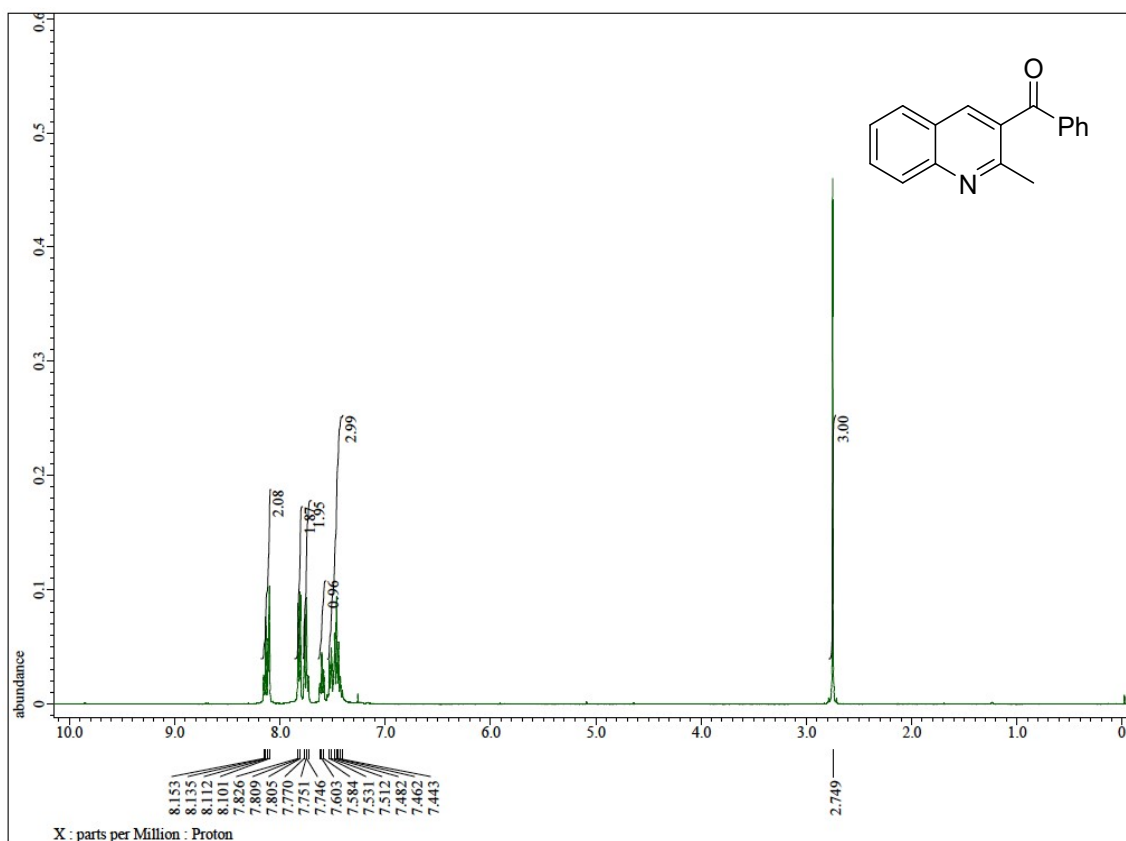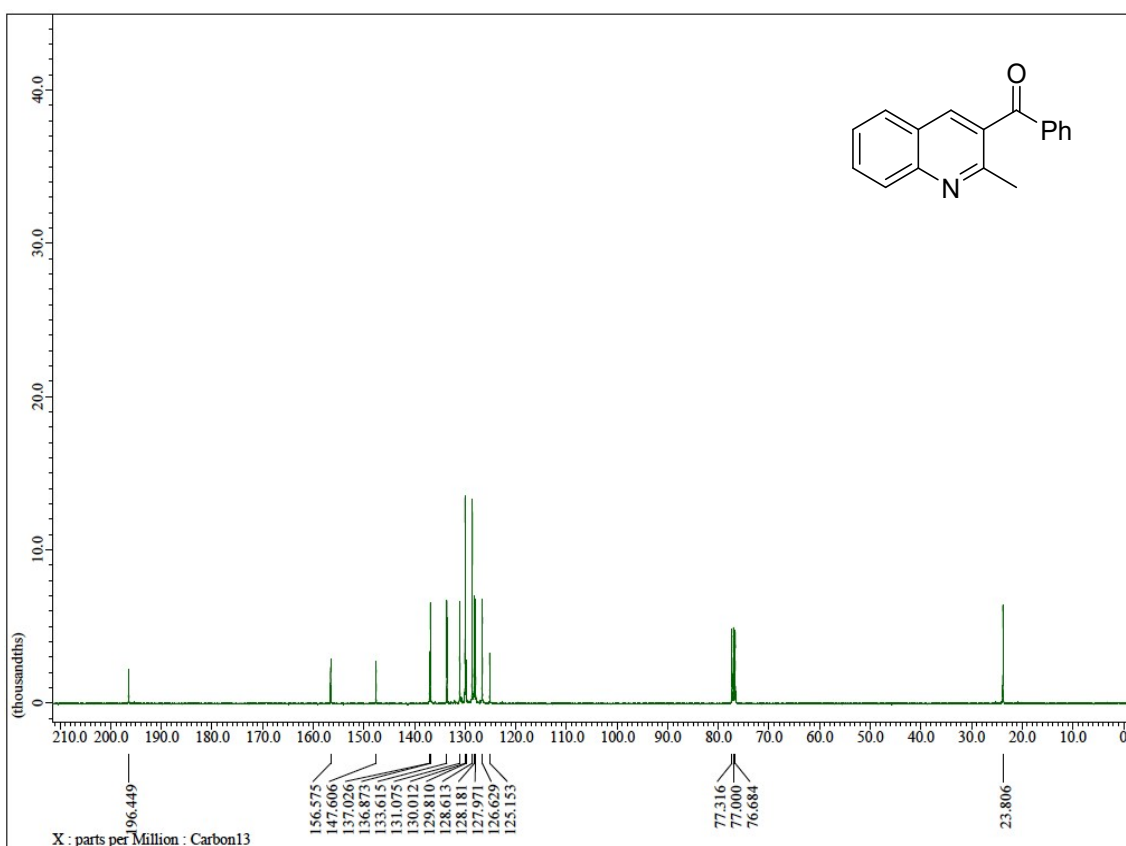

**Figure S5.** <sup>1</sup>H NMR of **3d** (400 MHz, CDCl<sub>3</sub>) and <sup>13</sup>C NMR of **3d** (100 MHz, CDCl<sub>3</sub>)

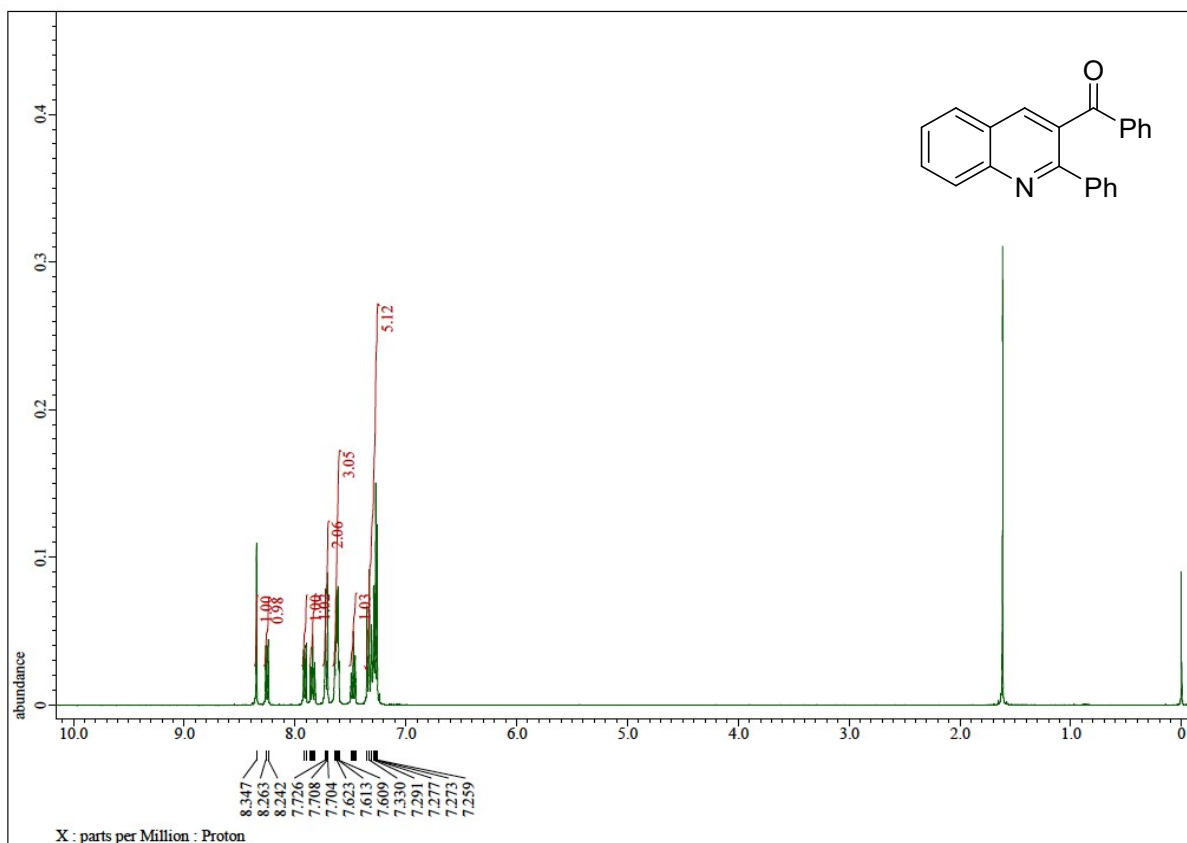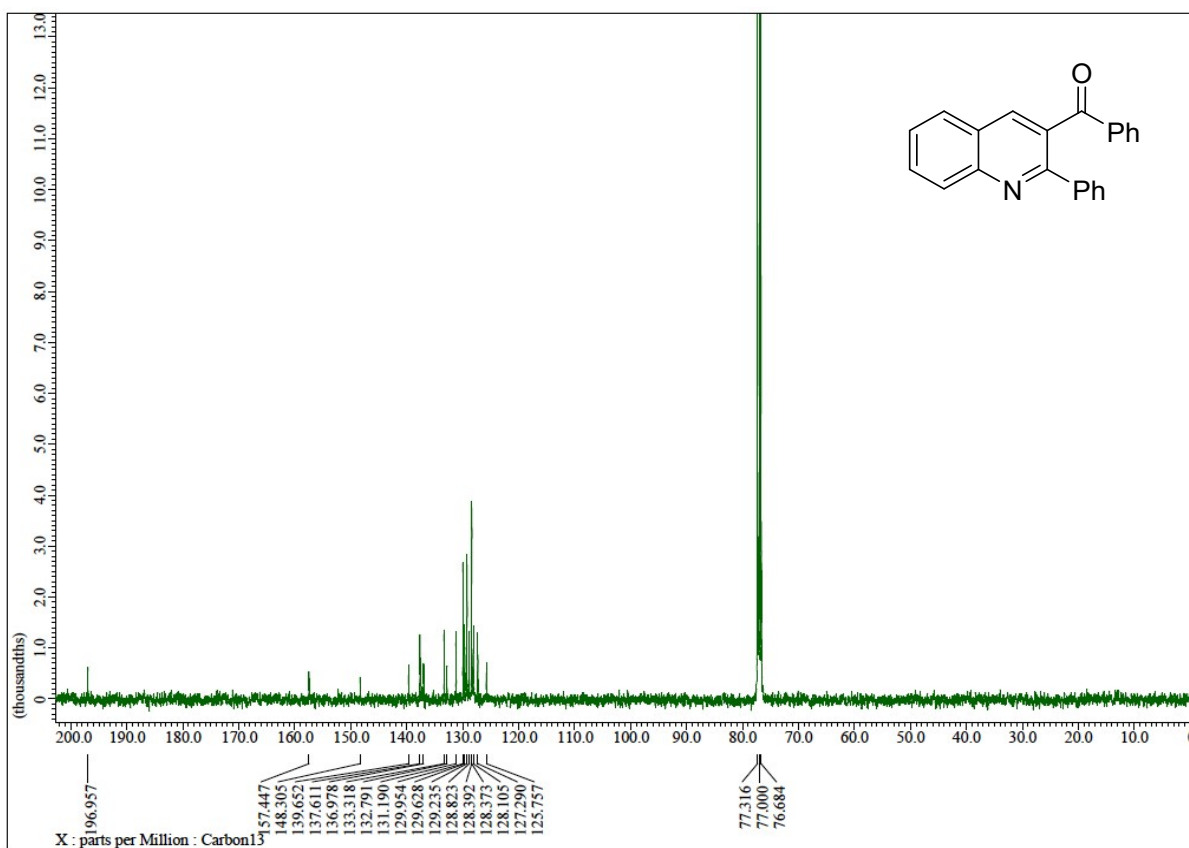

Figure S6. <sup>1</sup>H NMR of 3e (400 MHz, CDCl<sub>3</sub>) and <sup>13</sup>C NMR of 3e (100 MHz, CDCl<sub>3</sub>)

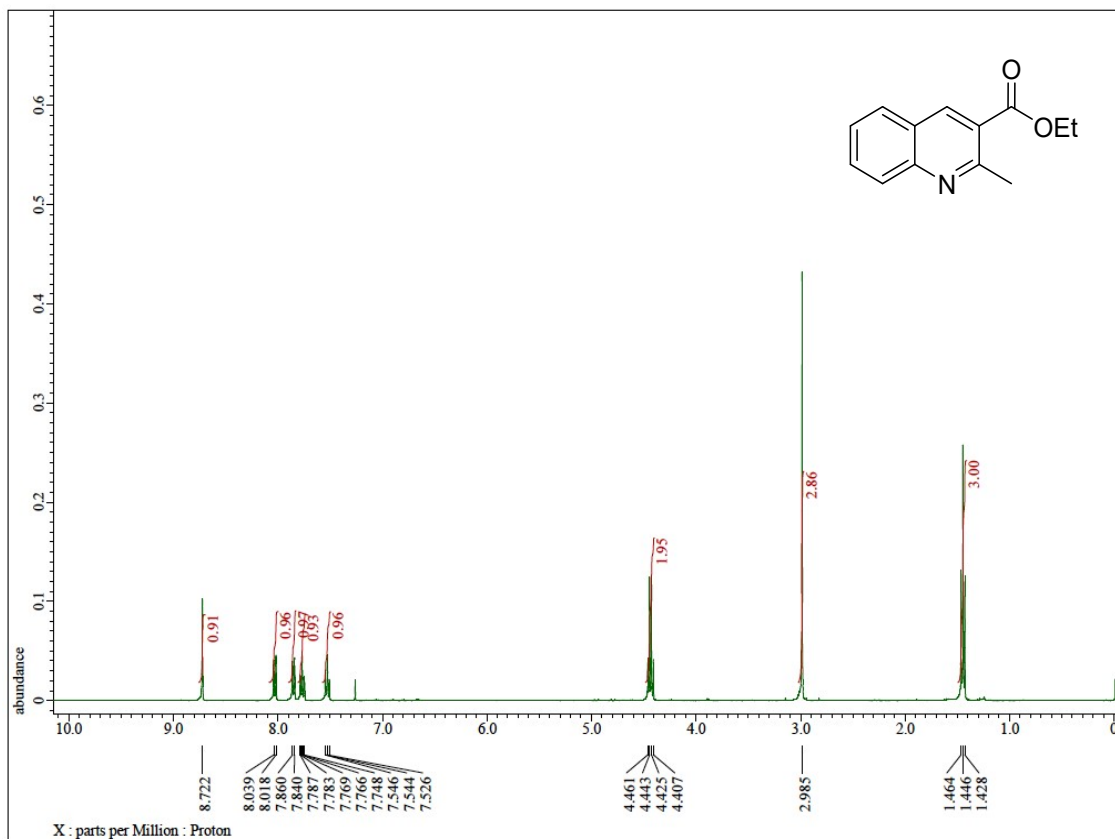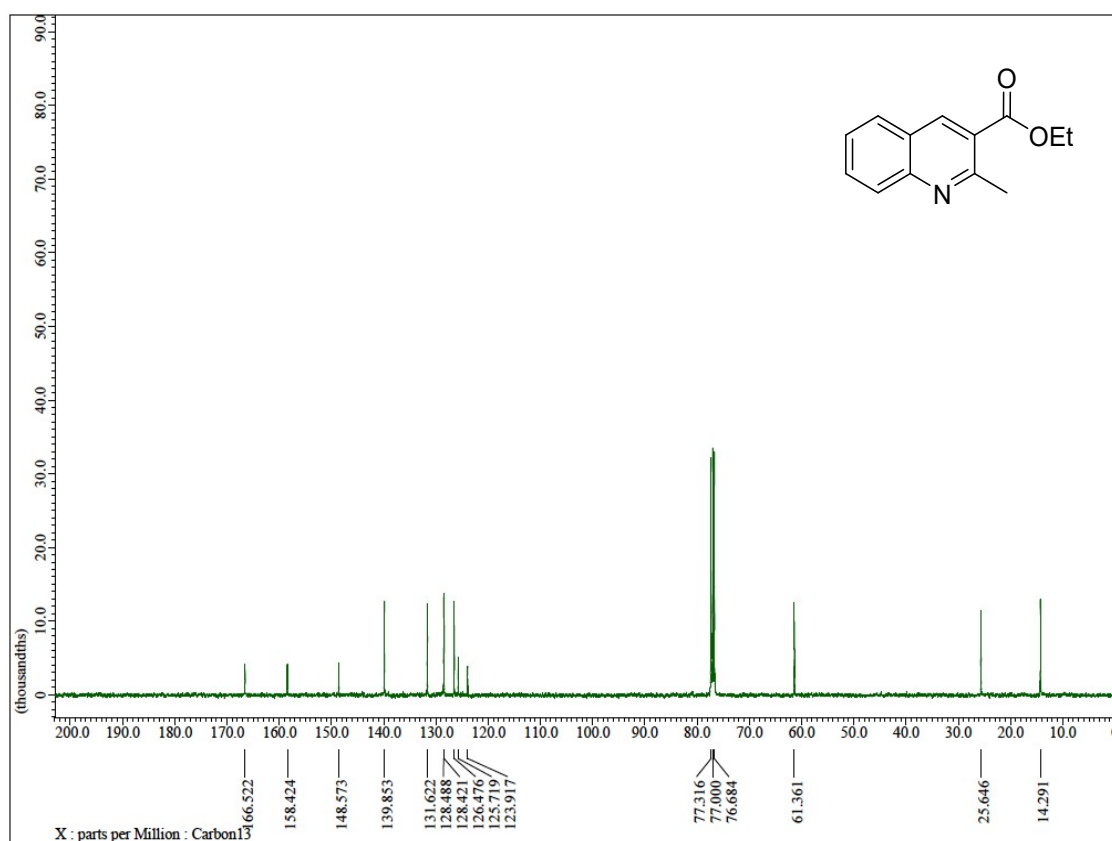

Figure S7. <sup>1</sup>H NMR of 3f (400 MHz, CDCl<sub>3</sub>) and <sup>13</sup>C NMR of 3f (100 MHz, CDCl<sub>3</sub>)

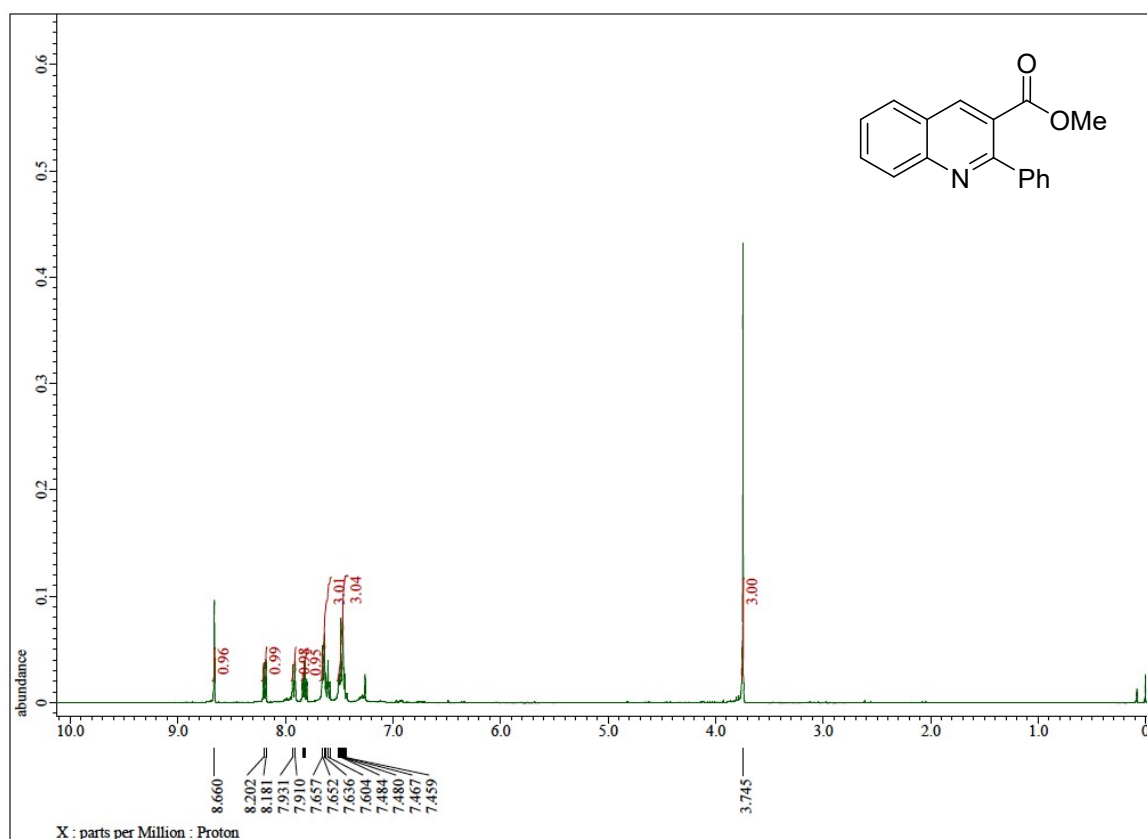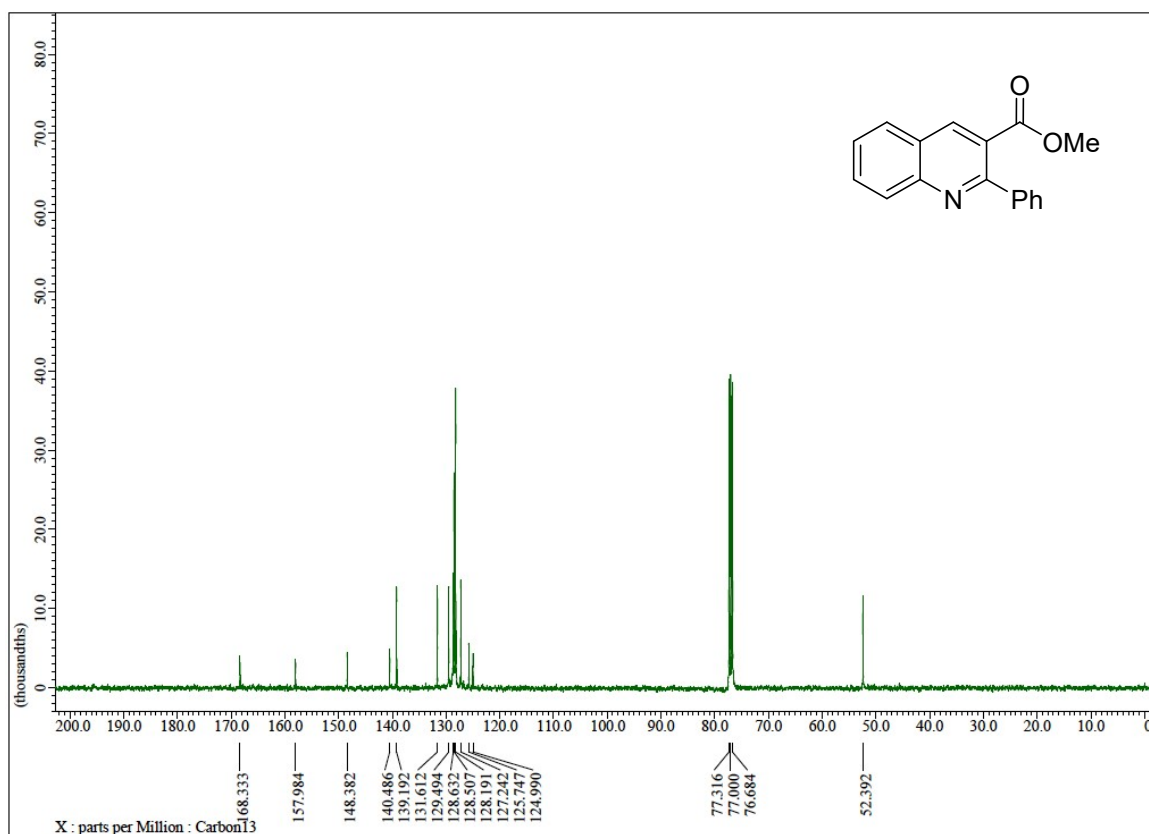

**Figure S8.** <sup>1</sup>H NMR of **3g** (400 MHz, CDCl<sub>3</sub>) and <sup>13</sup>C NMR of **3g** (100 MHz, CDCl<sub>3</sub>)



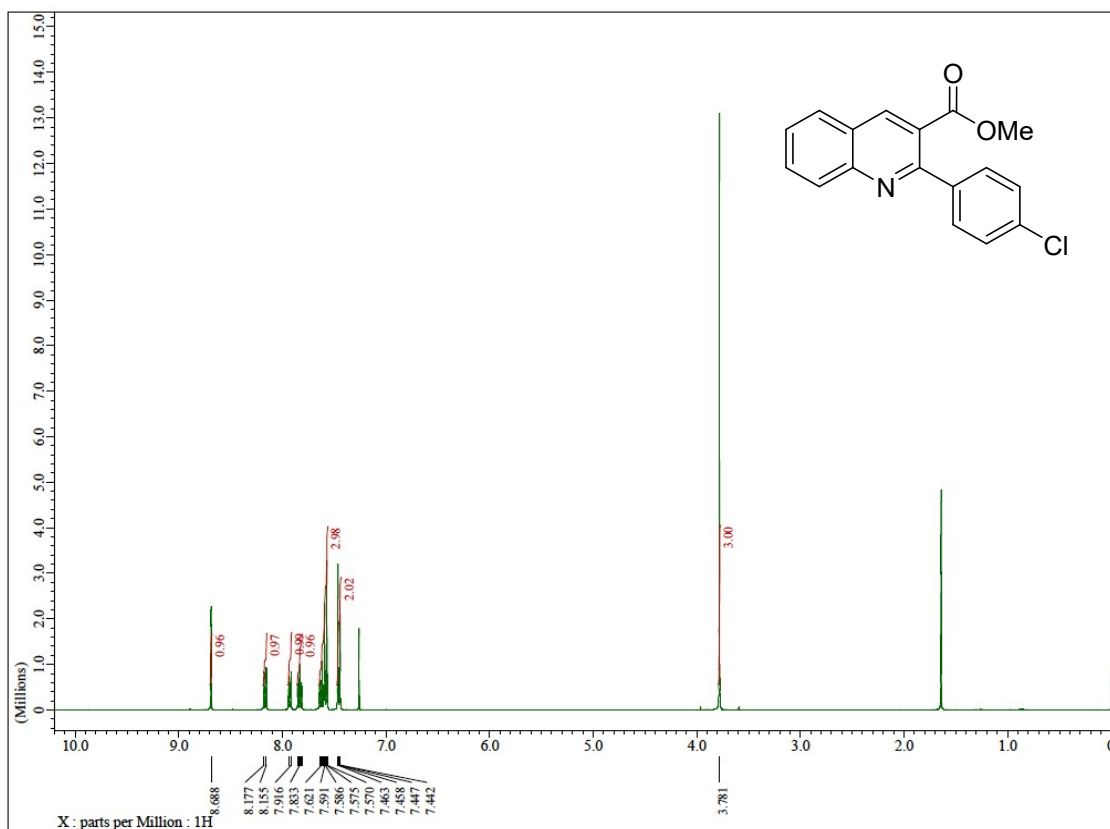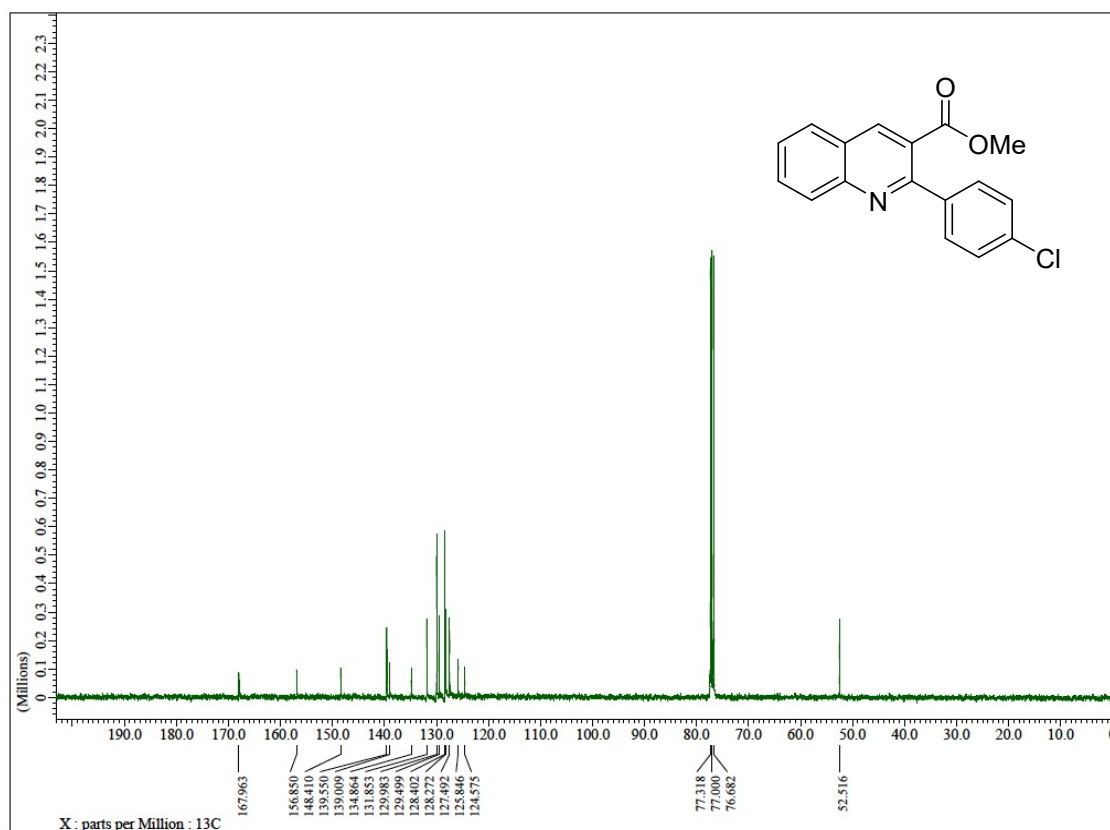

**Figure S9.** <sup>1</sup>H NMR of **3h** (400 MHz, CDCl<sub>3</sub>) and <sup>13</sup>C NMR of **3h** (100 MHz, CDCl<sub>3</sub>)

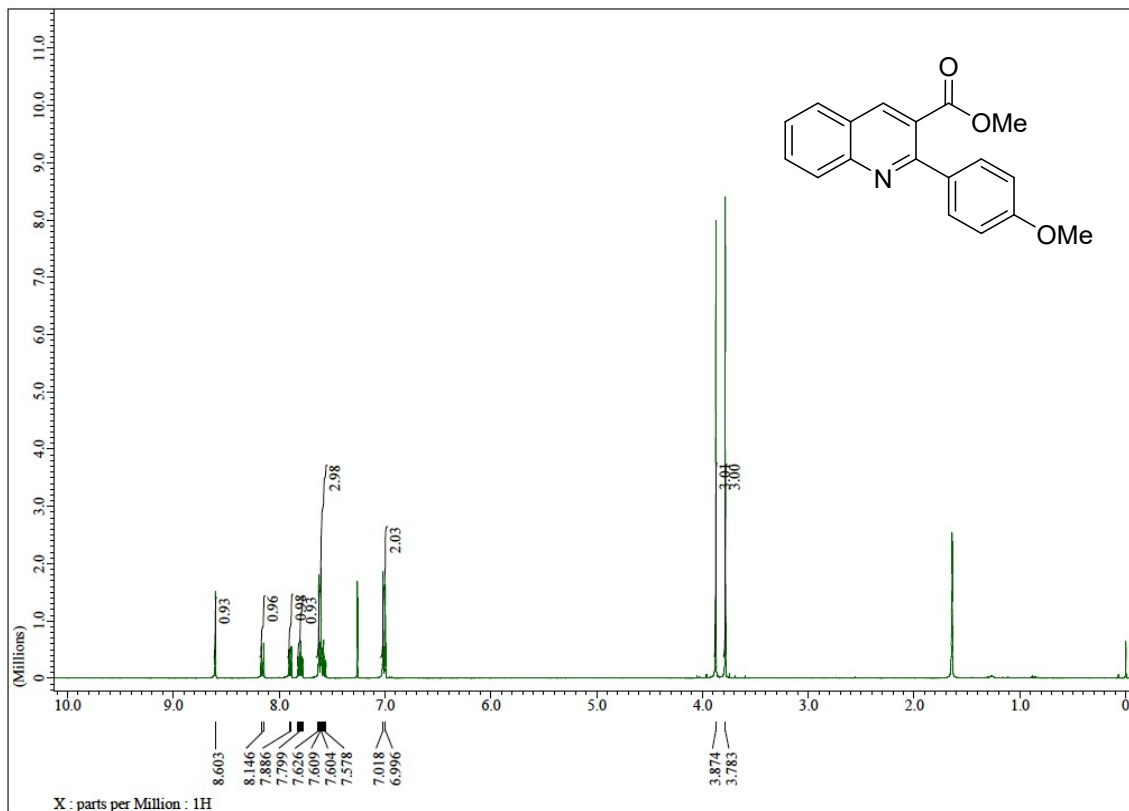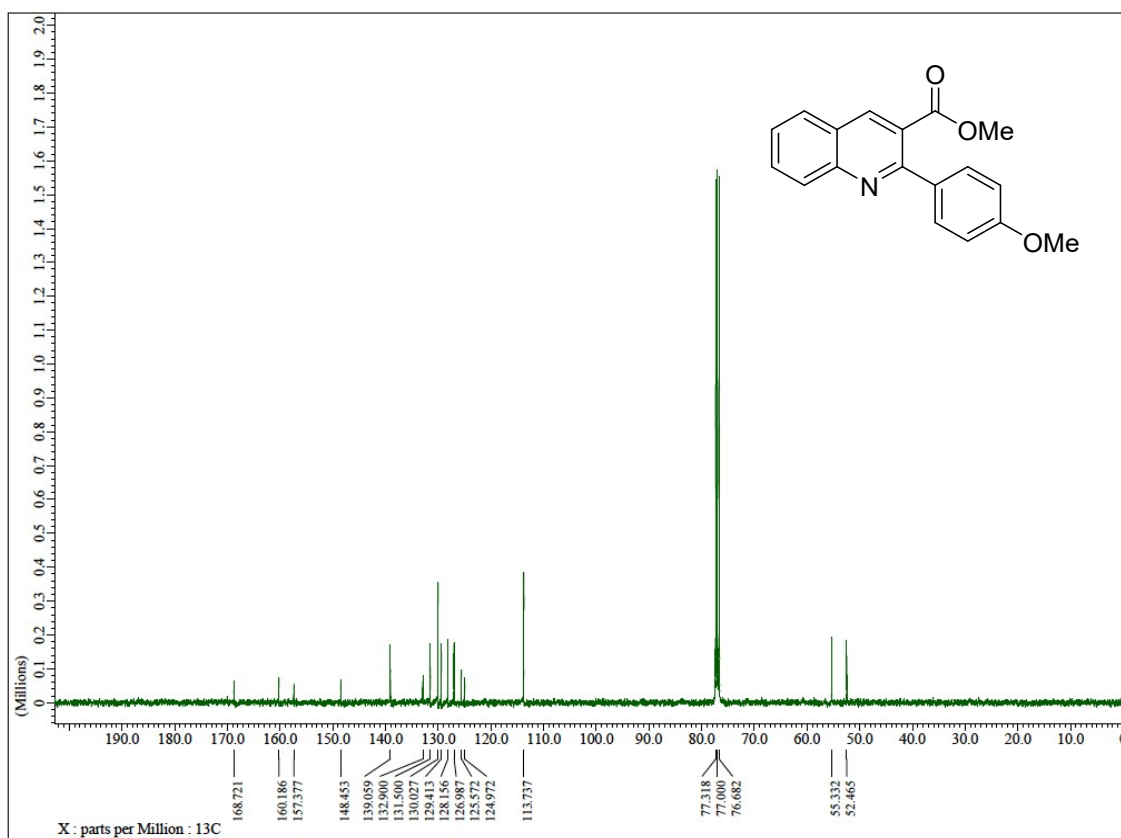

**Figure S10.** <sup>1</sup>H NMR of **3i** (400 MHz, CDCl<sub>3</sub>) and <sup>13</sup>C NMR of **3i** (100 MHz, CDCl<sub>3</sub>)

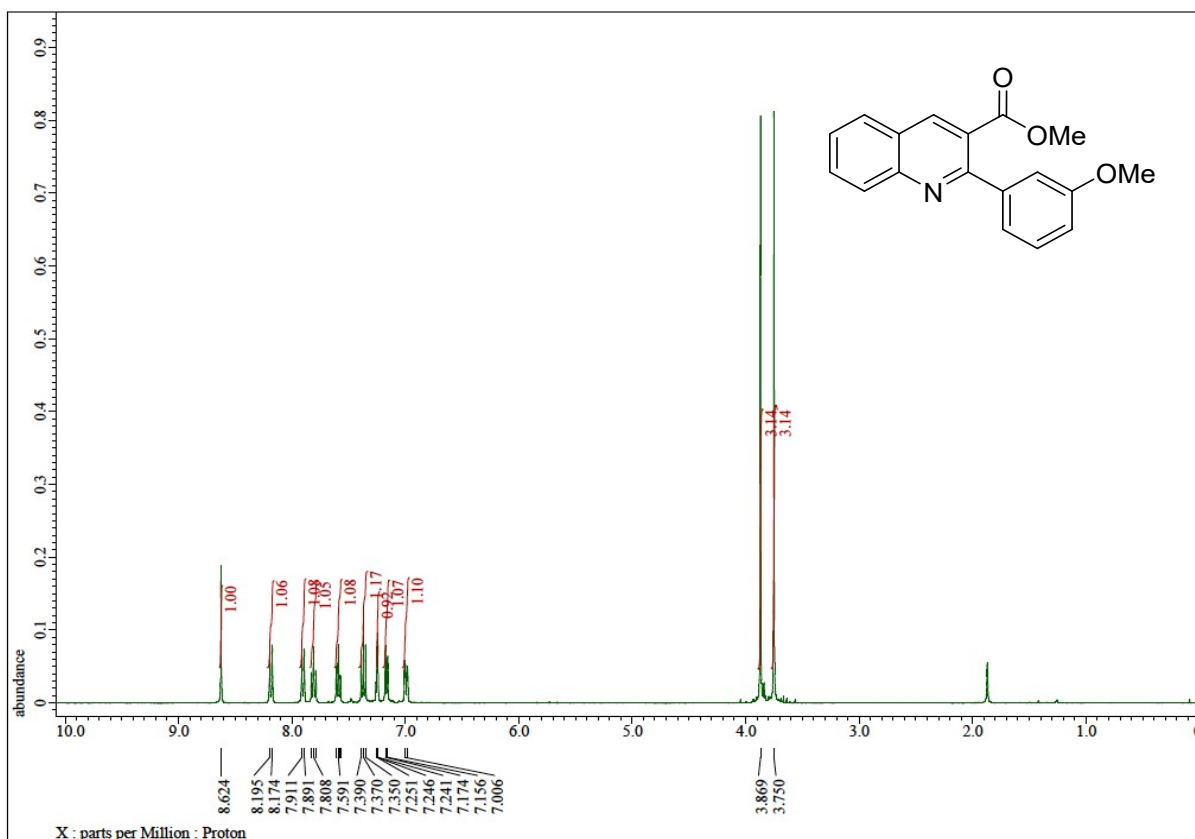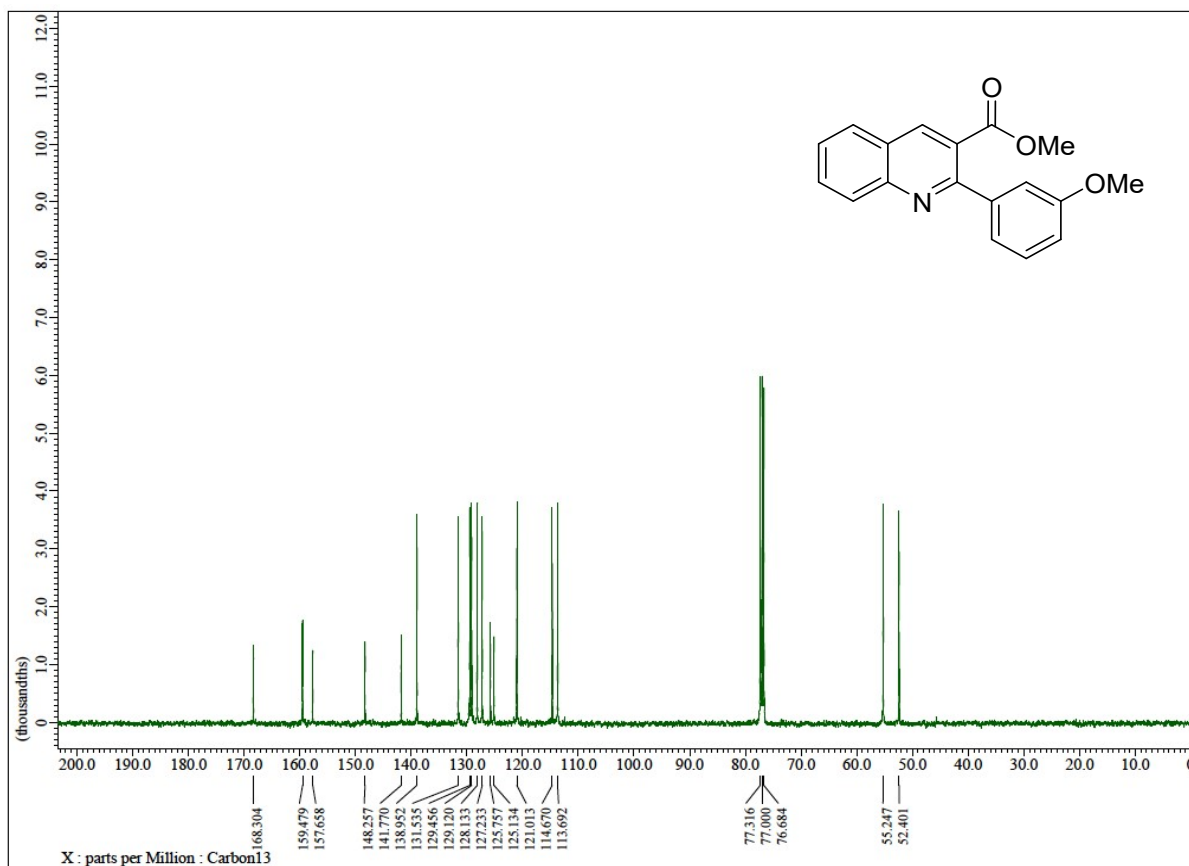

Figure S11. <sup>1</sup>H NMR of **3j** (400 MHz, CDCl<sub>3</sub>) and <sup>13</sup>C NMR of **3j** (100 MHz, CDCl<sub>3</sub>)

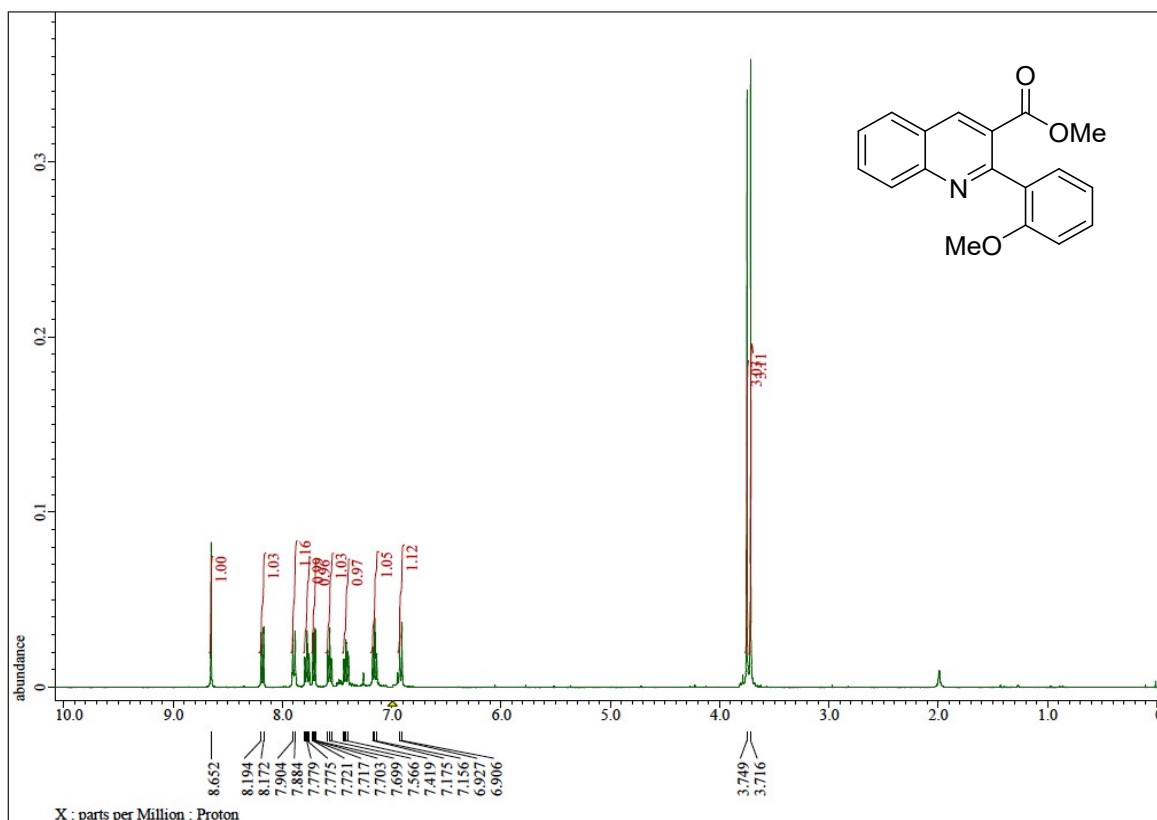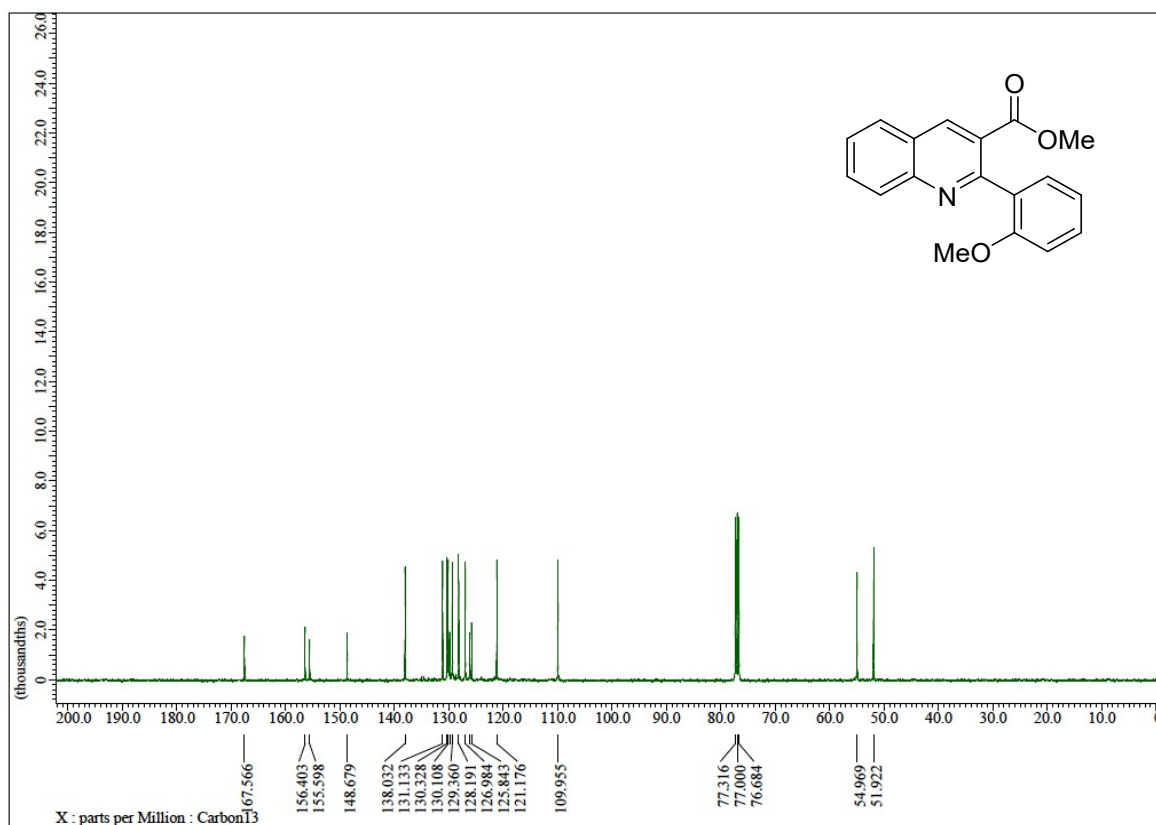

**Figure S12.** <sup>1</sup>H NMR of **3k** (400 MHz, CDCl<sub>3</sub>) and <sup>13</sup>C NMR of **3k** (100 MHz, CDCl<sub>3</sub>)

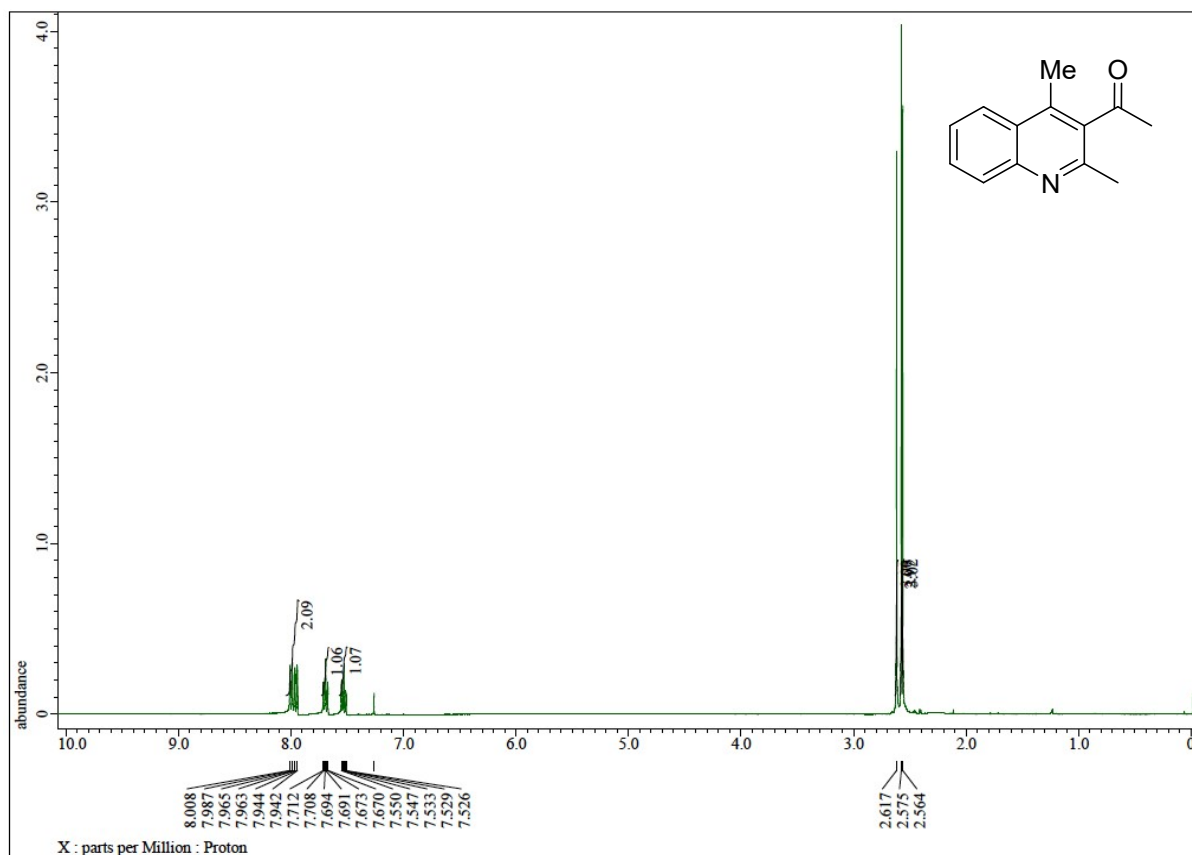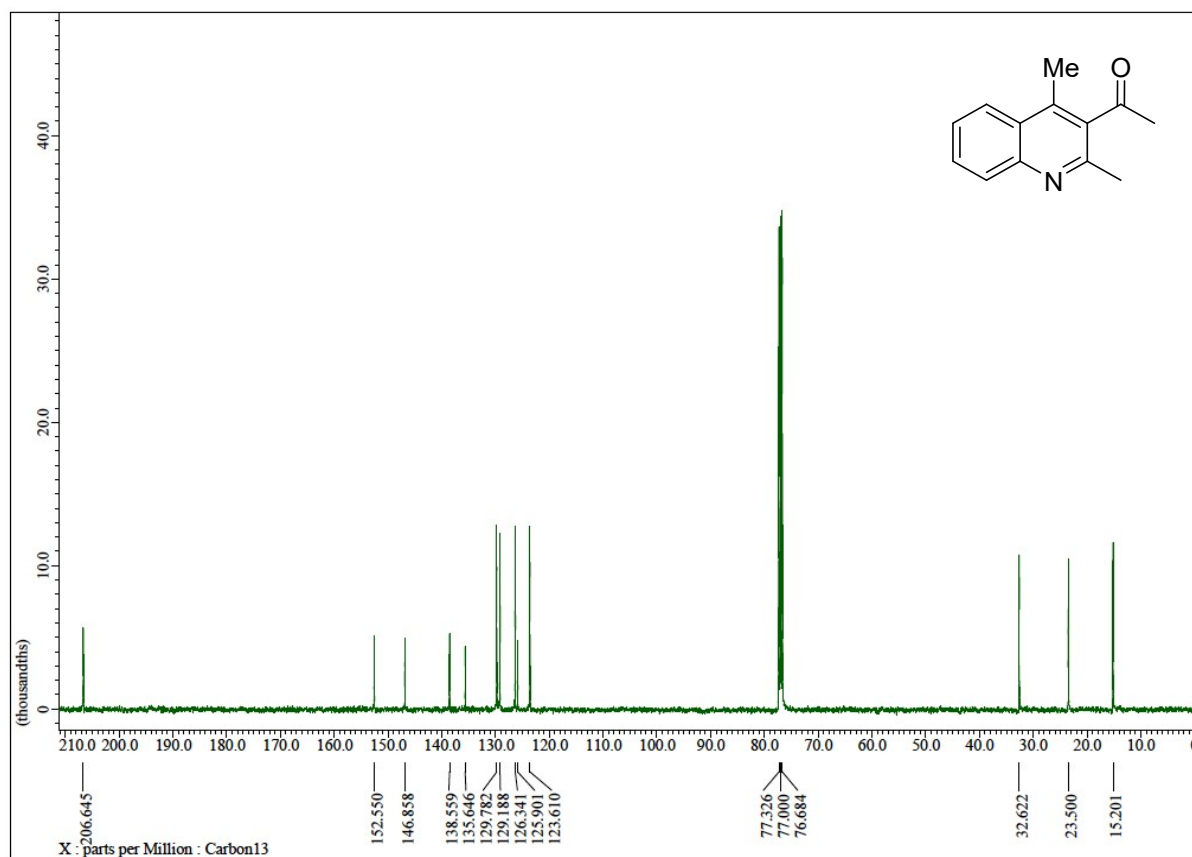

**Figure S13.** <sup>1</sup>H NMR of **31** (400 MHz, CDCl<sub>3</sub>) and <sup>13</sup>C NMR of **31** (100 MHz, CDCl<sub>3</sub>)

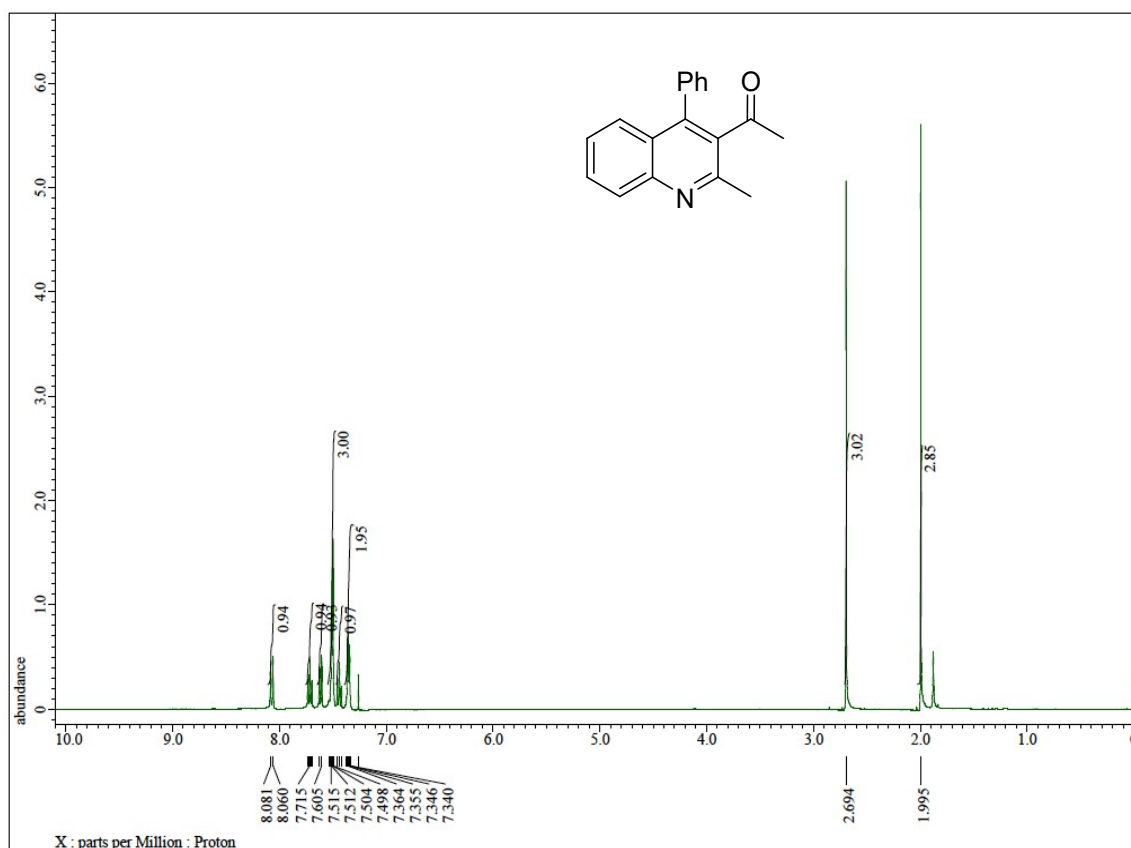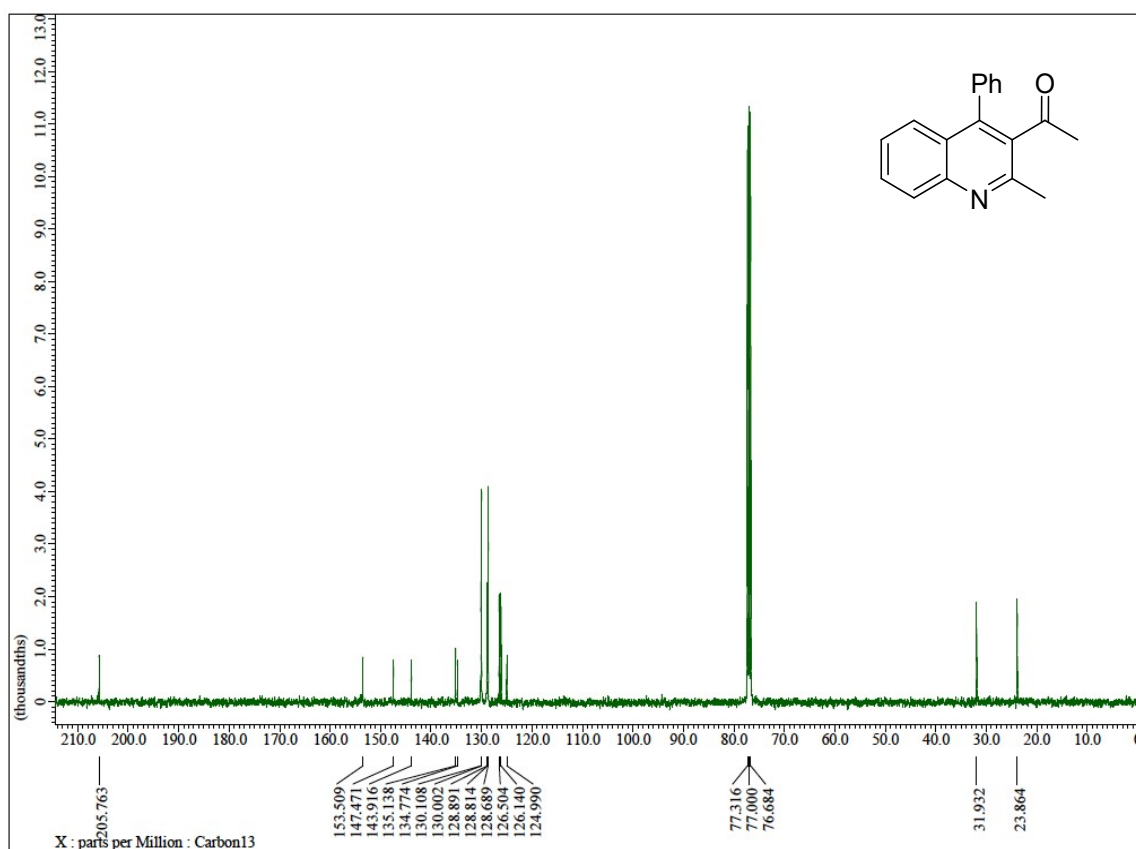

Figure S14. <sup>1</sup>H NMR of **3m** (400 MHz, CDCl<sub>3</sub>) and <sup>13</sup>C NMR of **3m** (100 MHz, CDCl<sub>3</sub>)

## FTIR spectra of quinoline products

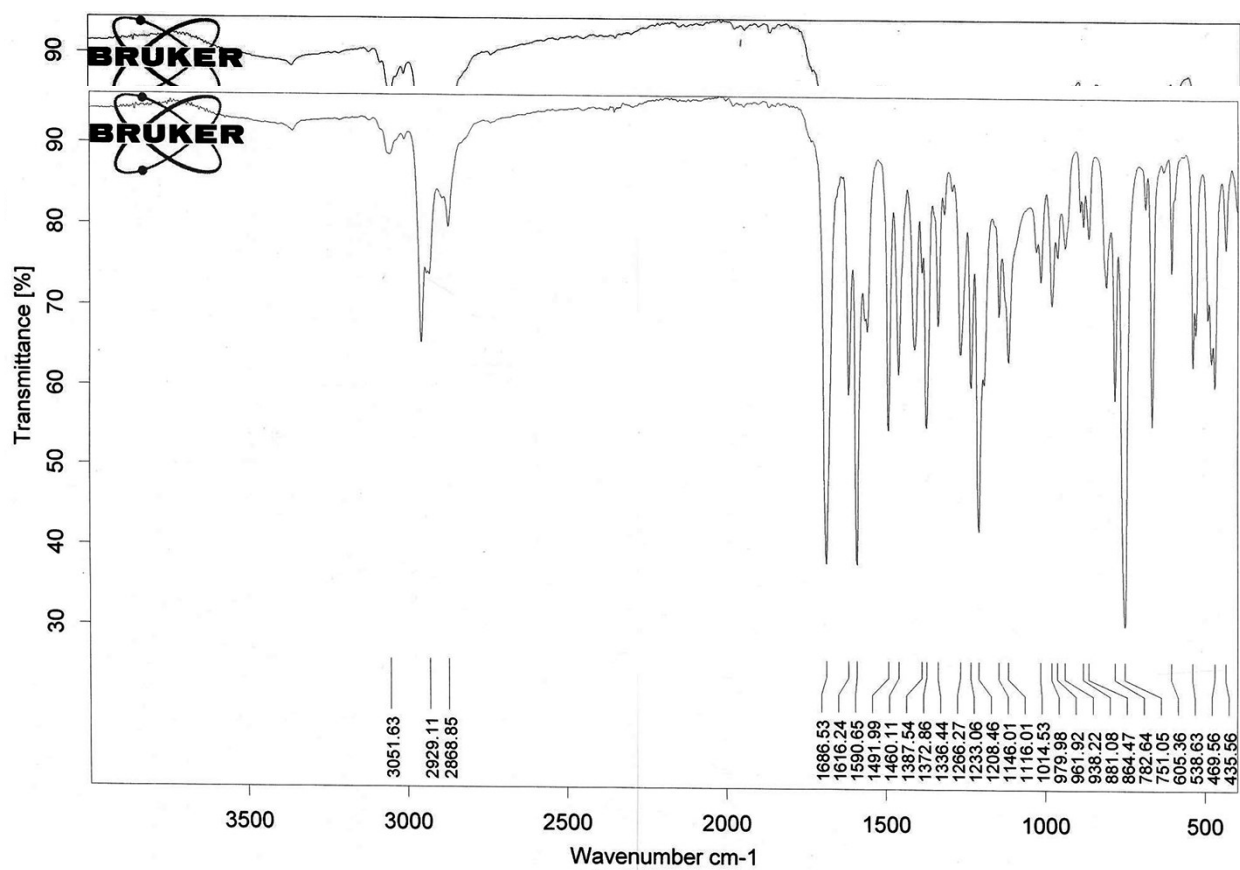

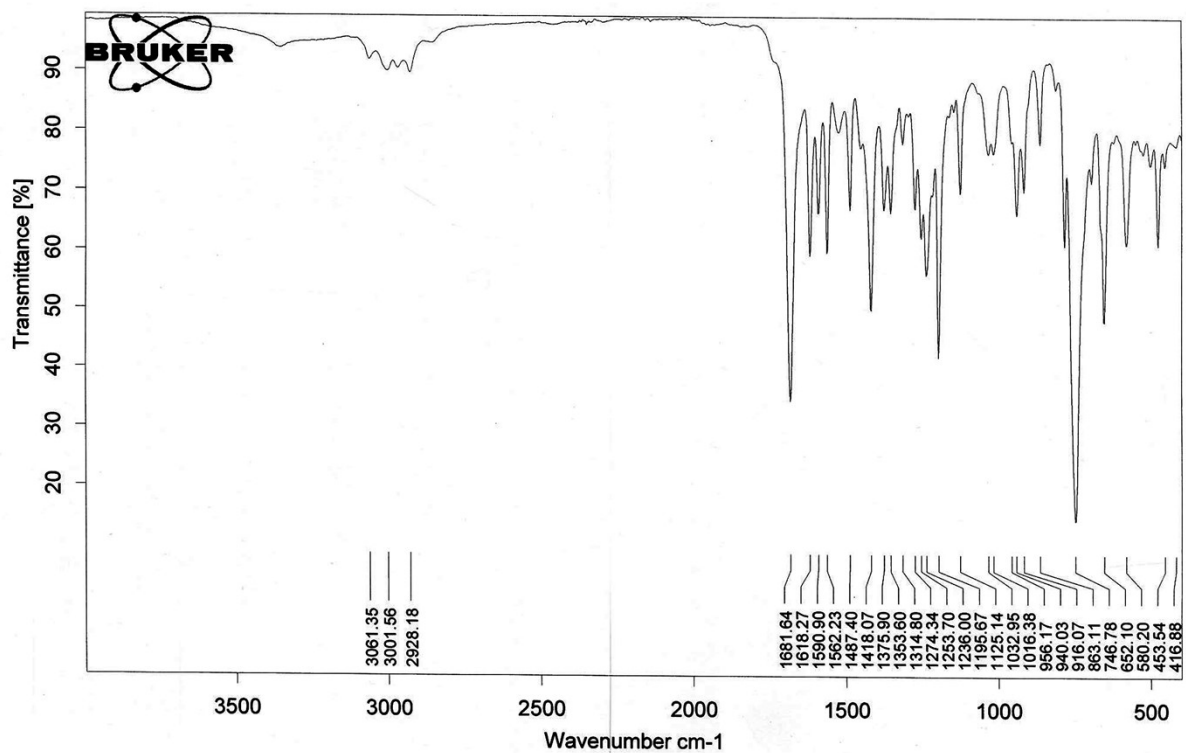

Figure S19. FTIR spectrum of 3c

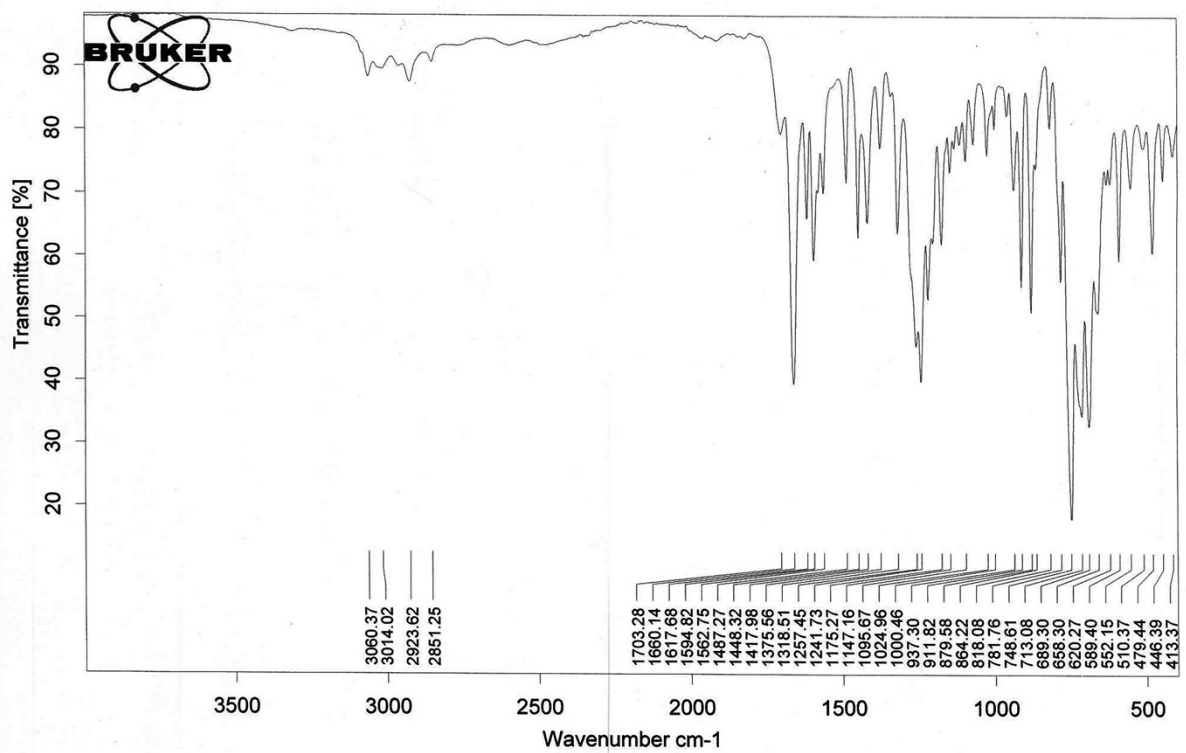

Figure S20. FTIR spectrum of 3d



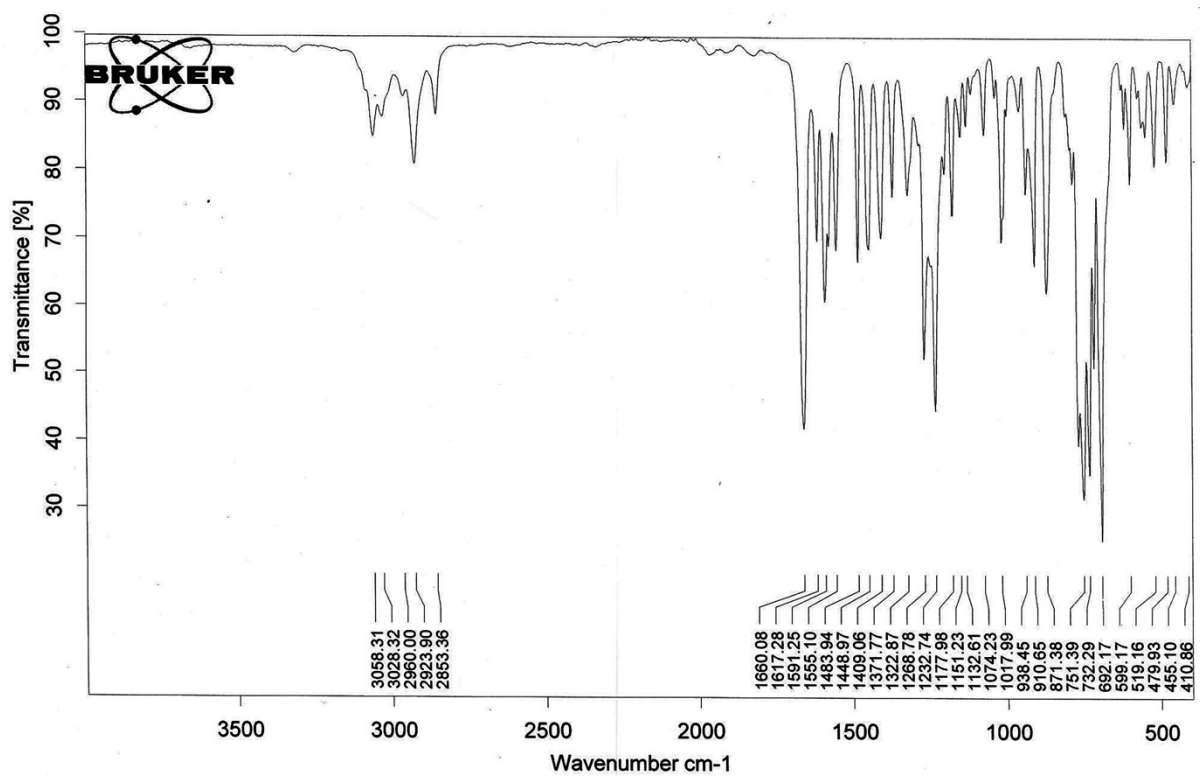

Figure S21. FTIR spectrum of 3e

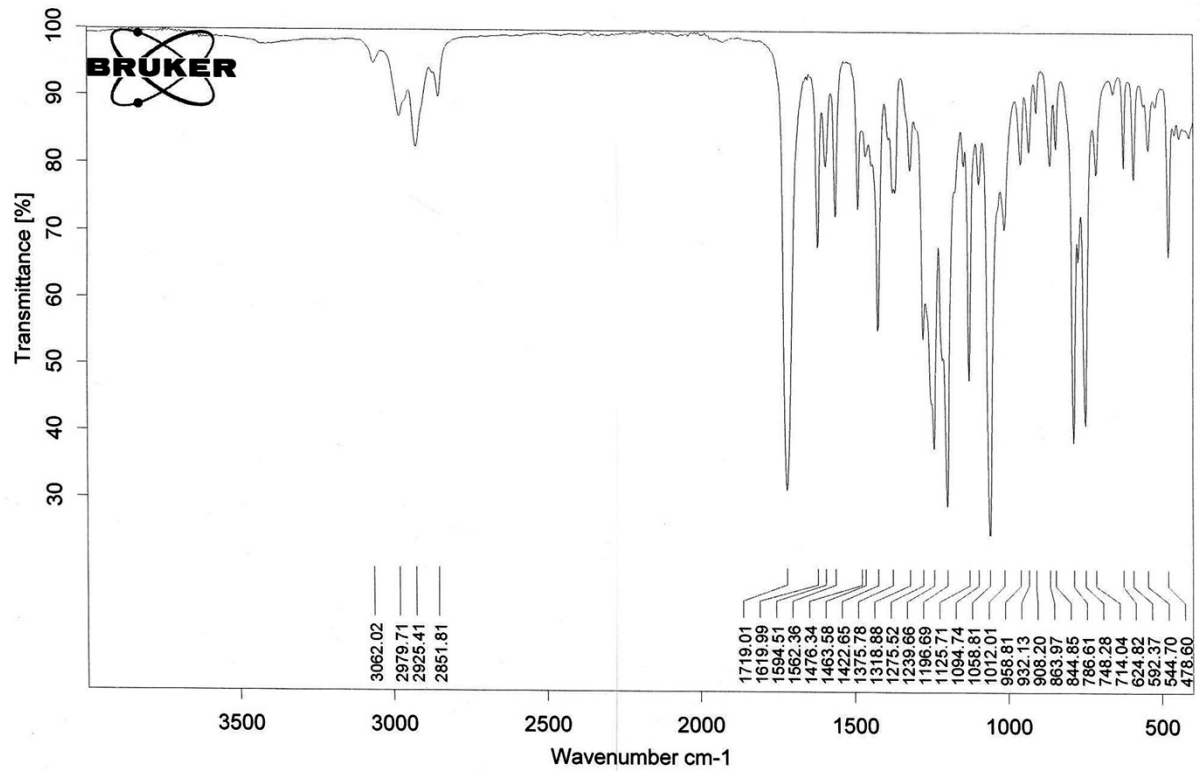

Figure S22. FTIR spectrum of 3f

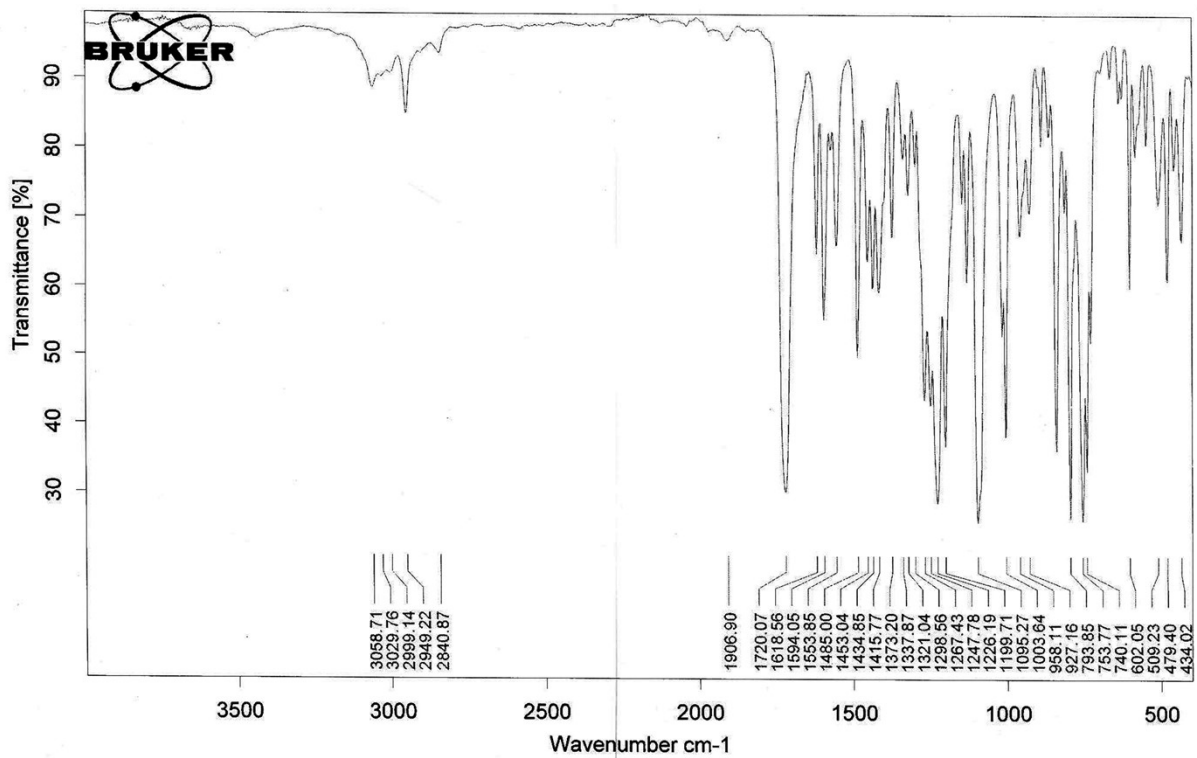

Figure S23. FTIR spectrum of **3g**

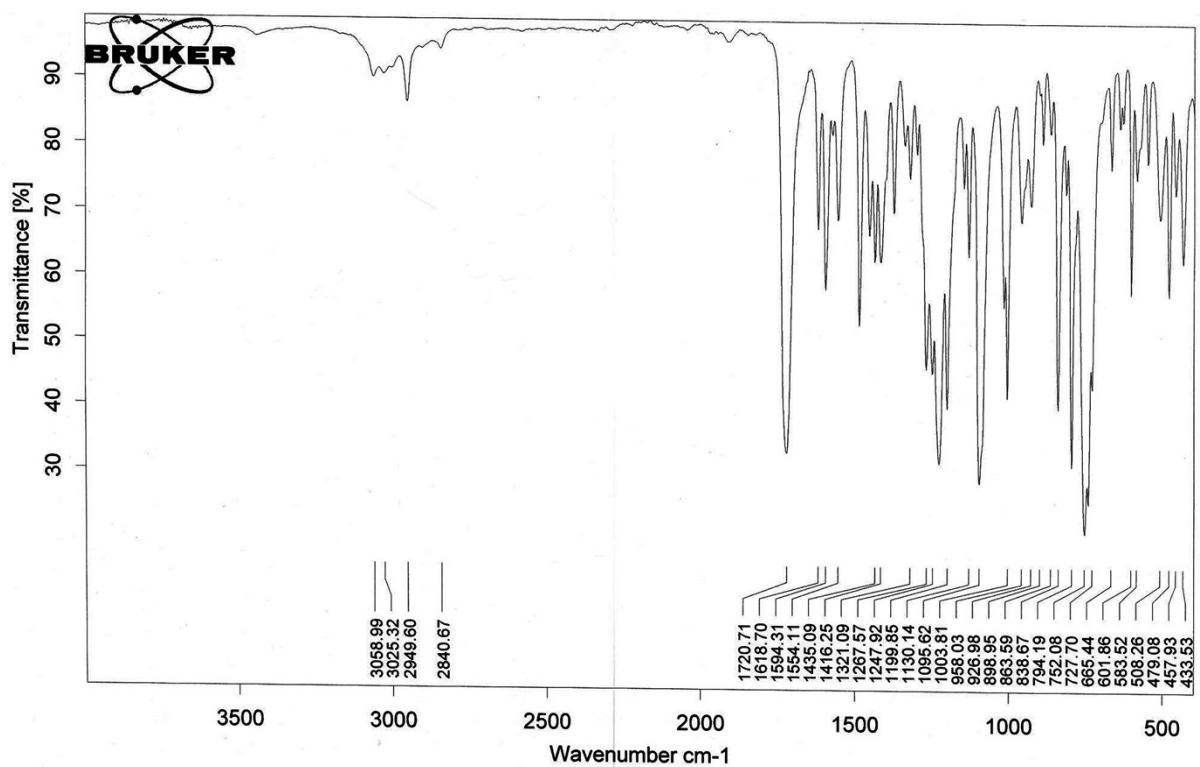

Figure S24. FTIR spectrum of **3h**

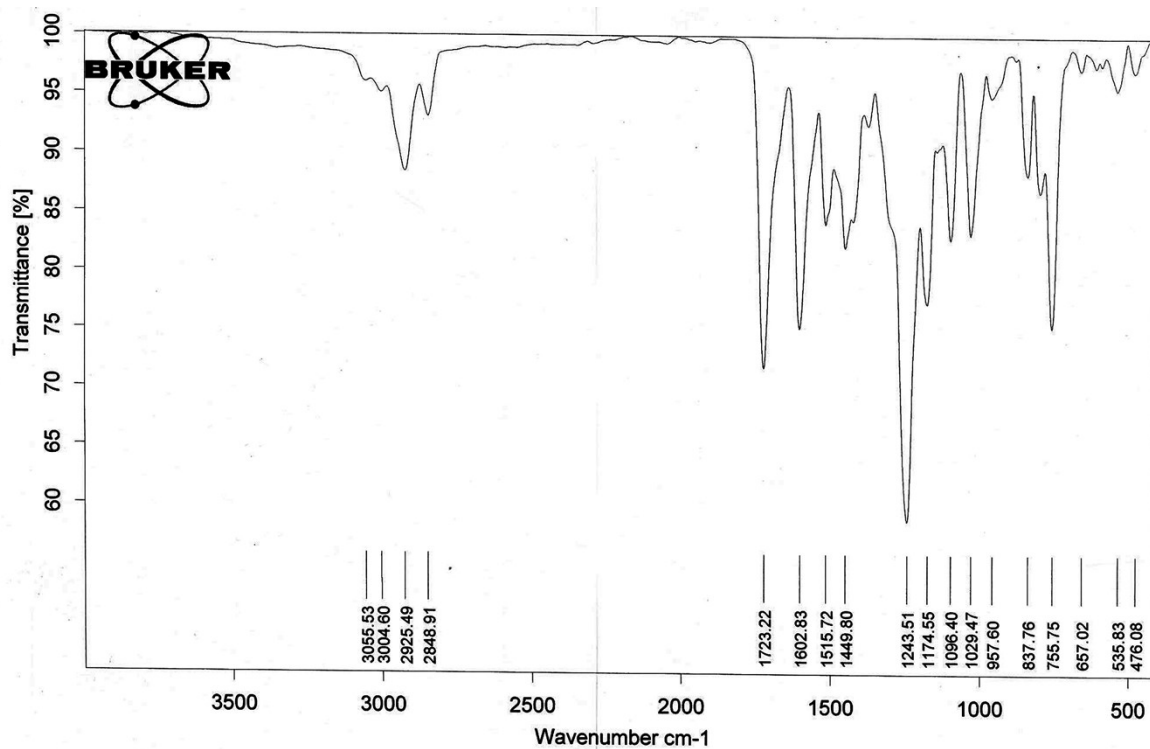

Figure S25. FTIR spectrum of 3i

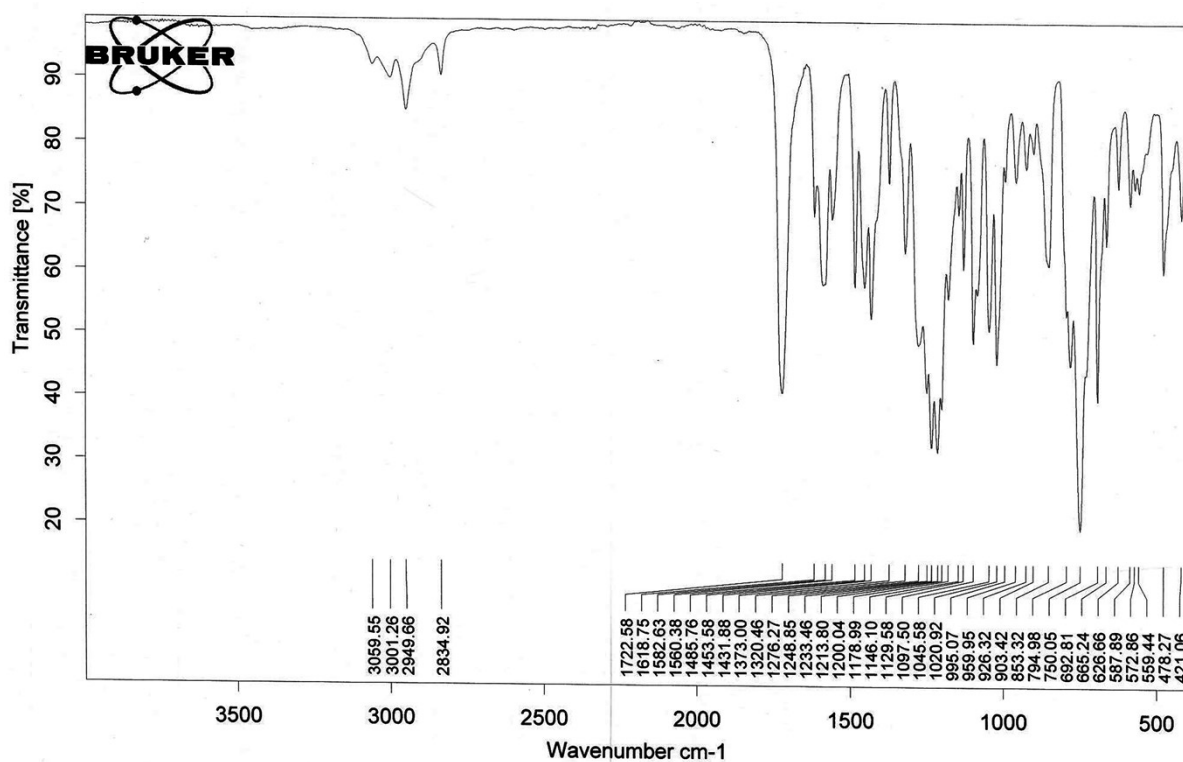

Figure S26. FTIR spectrum of 3j

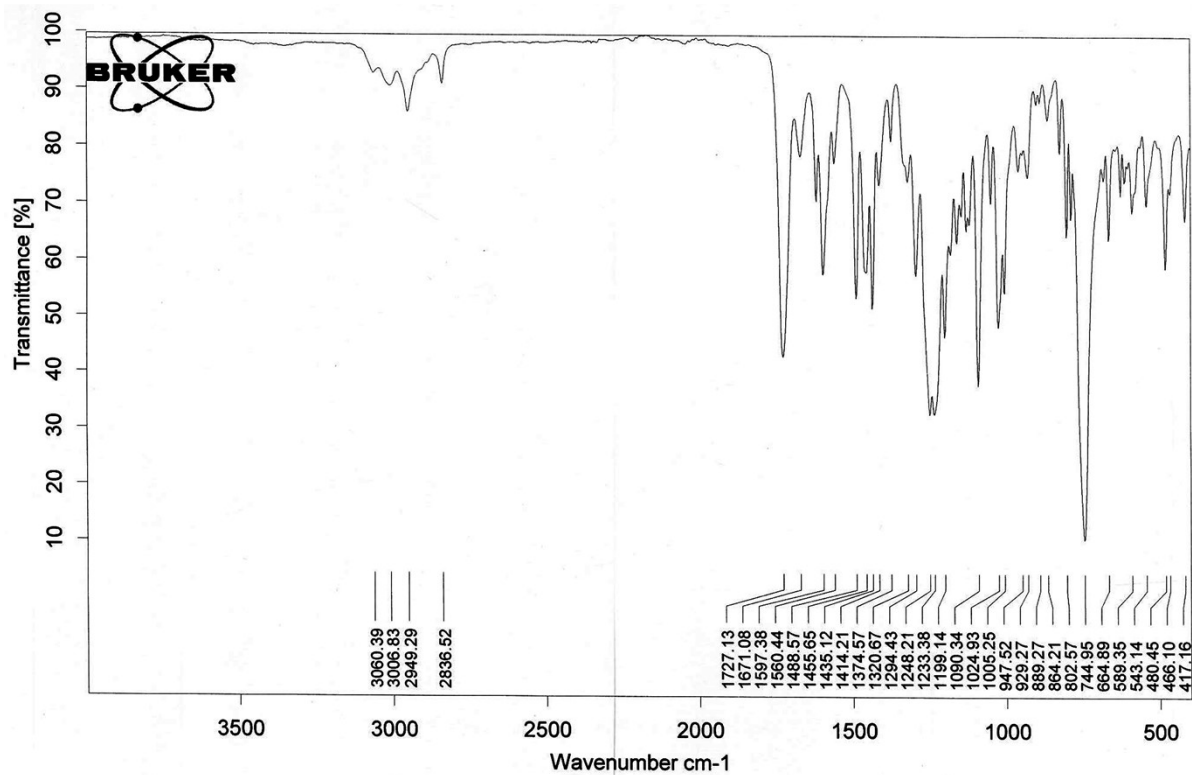

Figure S27. FTIR spectrum of 3k

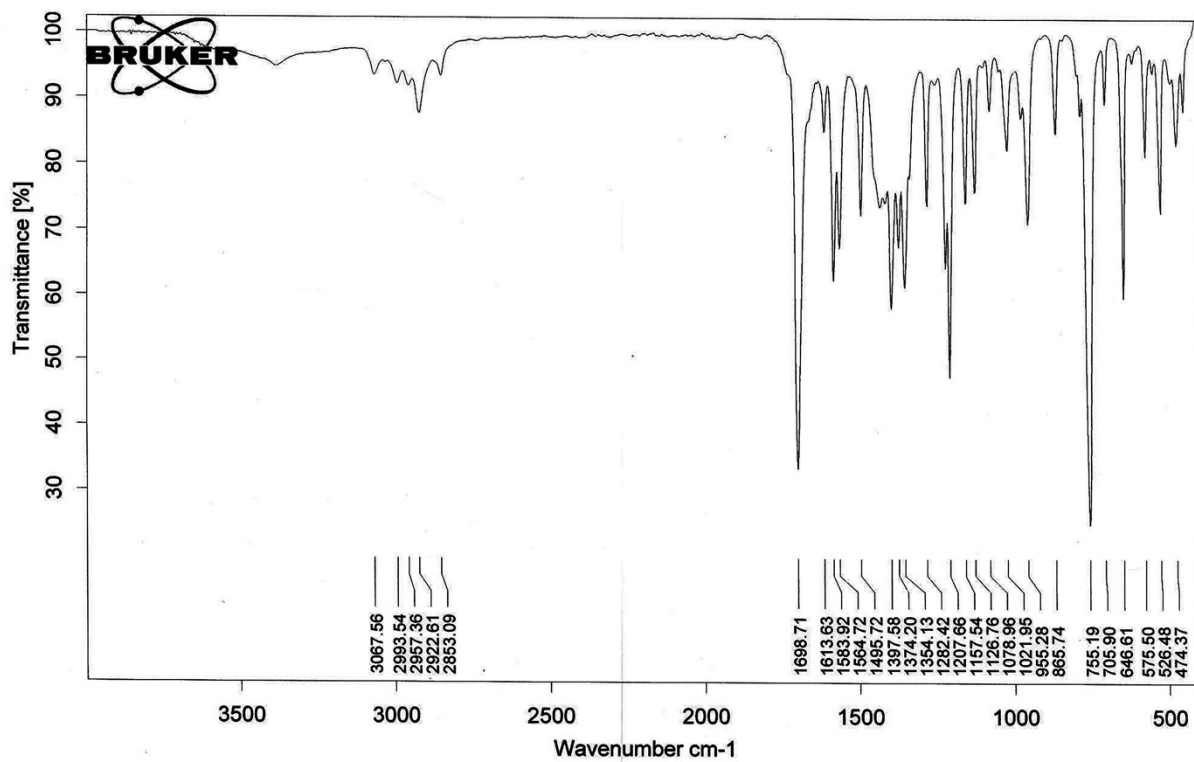

Figure S28. FTIR spectrum of 3l

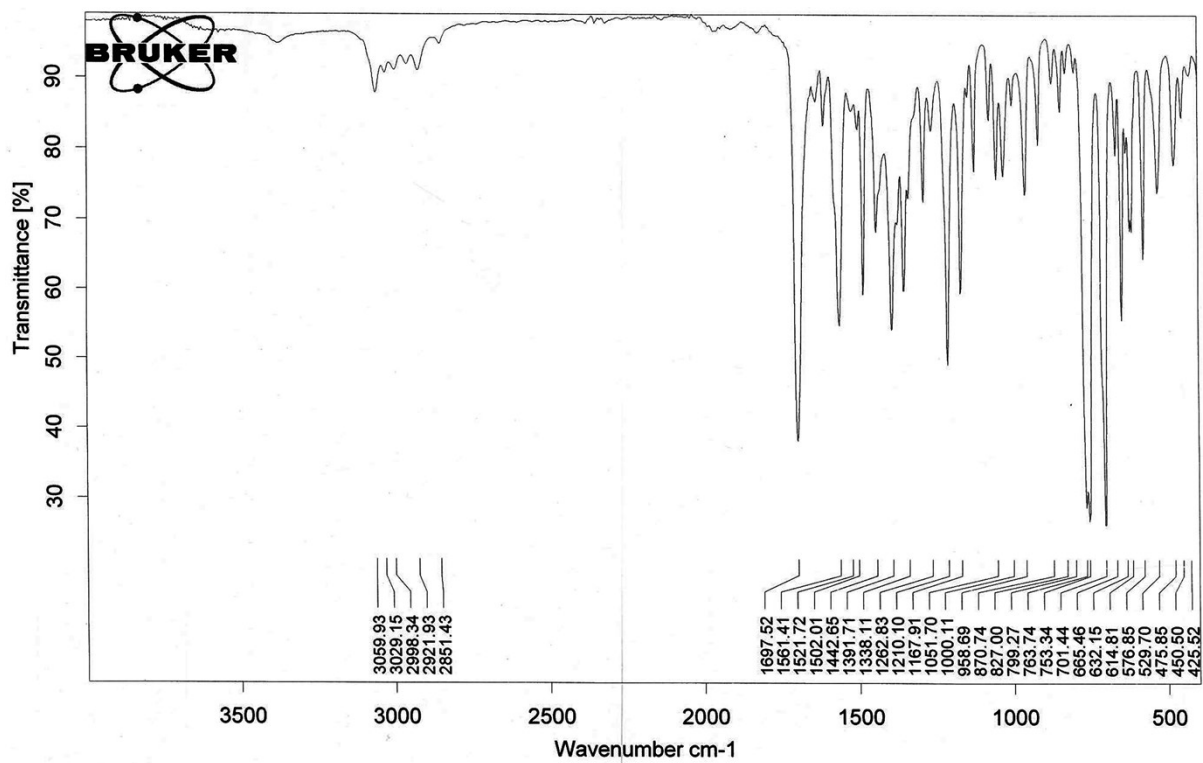

Figure S29. FTIR spectrum of 3m
